# Supplementary material for: Genetic basis of allochronic differentiation in the fall armyworm
Source: PubMed Central journal article supplement (PMC5339952; doi:10.1186/s12862-017-0911-5), 2017-03-06
Supplement: 12862_2017_911_MOESM1_ESM.pdf [file 12862_2017_911_MOESM1_ESM.pdf]

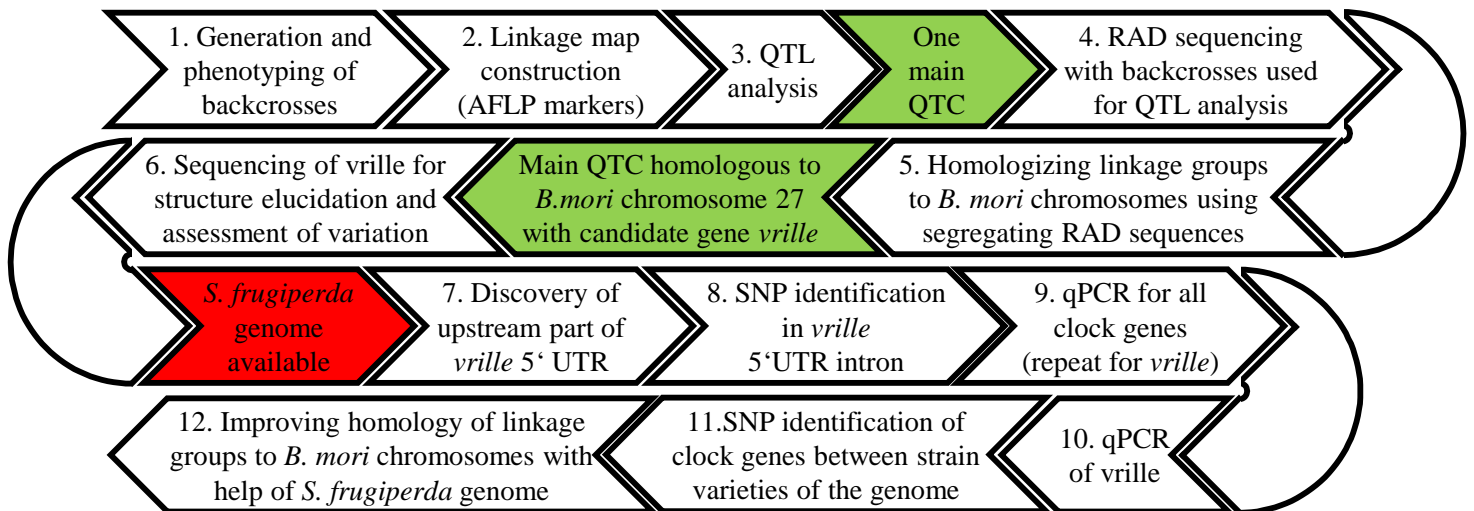

### Additional file 1

**Chronological outline of experiments.** Experiments are shown in white arrows;

Results leading to setup of follow-up experiments are shown in green arrows;

Availability of *S. frugiperda* genome is shown in red arrow.
