# Supplementary material for: Genetic basis of allochronic differentiation in the fall armyworm
Source: PubMed Central journal article supplement (PMC5339952; doi:10.1186/s12862-017-0911-5), 2017-03-06
Supplement: 12862_2017_911_MOESM5_ESM.pdf [file 12862_2017_911_MOESM5_ESM.pdf]

## Additional file 5

### Coverage of RAD sequences (Distribution of RAD sequences per individual sample)

| Individual | Average FW read Stackheight | Standard-deviation | Standard-error | Max FW read Stackheight | Min FW read Stackheight | Median FW read Stackheight | Number of different FW reads | Average Copy of PE reads | Standard-deviation | Standard-error | Max PE reads | Min PE reads | Median PE reads | Average Different PE read per FW read | Median Different PE read per FW read |
|------------|-----------------------------|--------------------|----------------|-------------------------|-------------------------|----------------------------|------------------------------|--------------------------|--------------------|----------------|--------------|--------------|-----------------|---------------------------------------|--------------------------------------|
| mgmA       | 426.6307                    | 1018.028           | 15.83725       | 32219                   | 2                       | 243                        | 4132                         | 90.00413                 | 111.4997           | 1.734577       | 979          | 1            | 56.25287        | 7.683204                              | 3                                    |
| mgfA       | 458.7566                    | 2385.873           | 36.01754       | 107630                  | 2                       | 225                        | 4388                         | 86.1971                  | 106.1036           | 1.601758       | 829          | 1            | 56.5            | 7.999544                              | 3                                    |
| moA        | 431.8876                    | 1204.144           | 18.66273       | 40573                   | 2                       | 241                        | 4163                         | 85.79489                 | 103.4392           | 1.603179       | 884          | 1            | 58              | 7.895268                              | 3                                    |
| faA        | 415.4024                    | 1197.019           | 17.18288       | 41120                   | 2                       | 224                        | 4853                         | 87.56805                 | 107.9381           | 1.549422       | 882          | 1            | 55.5            | 7.377911                              | 3                                    |
| bcA02      | 387.7372                    | 1056.735           | 15.08236       | 38044                   | 2                       | 210                        | 4909                         | 88.96191                 | 107.6816           | 1.536898       | 864          | 1            | 59.75           | 7.242819                              | 3                                    |
| bcA08      | 413.1341                    | 1047.458           | 15.58173       | 38200                   | 2                       | 228                        | 4519                         | 88.63931                 | 110.1302           | 1.638269       | 898          | 1            | 57              | 7.6289                                | 3                                    |
| bcA18      | 409.1944                    | 974.1887           | 13.85632       | 35374                   | 2                       | 230                        | 4943                         | 87.96394                 | 108.8721           | 1.548536       | 855          | 1            | 58.5            | 7.60085                               | 3                                    |
| bcA24      | 364.366                     | 1146.624           | 15.83548       | 45840                   | 2                       | 189                        | 5243                         | 83.94609                 | 104.3151           | 1.440646       | 847          | 1            | 54.8            | 6.664124                              | 2                                    |
| bcA25      | 393.1814                    | 1075.532           | 15.52882       | 35691                   | 2                       | 217                        | 4797                         | 83.85207                 | 105.0766           | 1.517124       | 849          | 1            | 53.5            | 8.147801                              | 3                                    |
| bcA26      | 421.4899                    | 1251.074           | 16.42882       | 40588                   | 2                       | 195                        | 5799                         | 73.1337                  | 95.20368           | 1.250193       | 817          | 1            | 43.57143        | 8.608036                              | 3                                    |
| bcA39      | 436.8314                    | 1237.587           | 16.08613       | 56709                   | 2                       | 205                        | 5919                         | 79.68049                 | 102.0066           | 1.32588        | 1170         | 1            | 51.36364        | 7.618855                              | 3                                    |
| bcA40      | 387.1765                    | 929.5574           | 13.85856       | 29871                   | 2                       | 212                        | 4499                         | 85.72081                 | 103.8102           | 1.547682       | 824          | 1            | 58.5            | 7.287842                              | 3                                    |
| bcA57      | 426.8583                    | 1106.231           | 15.43144       | 42410                   | 2                       | 223                        | 5139                         | 87.98172                 | 114.7766           | 1.601084       | 905          | 1            | 51              | 8.52014                               | 3                                    |
| bcA60      | 450.5923                    | 1951.403           | 25.8856        | 92590                   | 2                       | 201                        | 5683                         | 82.85137                 | 108.4086           | 1.438054       | 951          | 1            | 46.4            | 8.675875                              | 3                                    |
| bcA71      | 411.6647                    | 1056.592           | 14.80832       | 45594                   | 2                       | 221                        | 5091                         | 92.14743                 | 116.1186           | 1.627422       | 900          | 1            | 57.25           | 7.097623                              | 3                                    |
| mgmB       | 439.8348                    | 1749.672           | 25.00552       | 65713                   | 2                       | 190                        | 4896                         | 84.30461                 | 108.096            | 1.54486        | 881          | 1            | 51              | 8.24857                               | 3                                    |
| mgfB       | 374.7253                    | 1247.66            | 19.53048       | 49200                   | 2                       | 204                        | 4081                         | 87.46333                 | 109.3928           | 1.712401       | 789          | 1            | 54.8            | 6.598873                              | 2                                    |
| moB        | 415.3913                    | 1221.099           | 16.44736       | 43634                   | 2                       | 214                        | 5512                         | 82.76193                 | 107.7499           | 1.451316       | 881          | 1            | 50.5            | 8.097242                              | 3                                    |
| faB        | 319.5755                    | 529.0829           | 14.25277       | 8100                    | 2                       | 222                        | 1378                         | 110.9249                 | 133.7814           | 3.603886       | 962          | 1            | 73.83333        | 5.197388                              | 2                                    |
| bcB62      | 420.5553                    | 1406.466           | 17.20455       | 54590                   | 2                       | 177                        | 6683                         | 72.77307                 | 98.2771            | 1.202172       | 860          | 1            | 37              | 8.438276                              | 3                                    |
| bcB49      | 420.7763                    | 1953.068           | 25.45483       | 109348                  | 2                       | 167                        | 5887                         | 74.83013                 | 94.73558           | 1.234713       | 853          | 1            | 46.5            | 7.651266                              | 3                                    |
| bcB47      | 457.8441                    | 2020.614           | 25.69915       | 106689                  | 2                       | 196                        | 6182                         | 80.17825                 | 105.2327           | 1.338401       | 972          | 1            | 46.21324        | 8.549822                              | 3                                    |
| bcB43      | 427.5193                    | 1501.815           | 19.71979       | 69494                   | 2                       | 205                        | 5800                         | 79.48143                 | 100.2758           | 1.316685       | 1093         | 1            | 51.0625         | 8.03931                               | 3                                    |
| bcB32      | 460.2086                    | 2572.537           | 33.6229        | 136510                  | 2                       | 191                        | 5854                         | 74.8997                  | 98.23262           | 1.283895       | 826          | 1            | 41              | 8.406218                              | 3                                    |
| bcB26      | 513.6885                    | 2049.415           | 22.44393       | 98066                   | 2                       | 115                        | 8338                         | 63.37613                 | 89.00555           | 0.974734       | 884          | 1            | 17.84659        | 10.40621                              | 3                                    |
| bcB25      | 408.9109                    | 1531.764           | 20.82732       | 66322                   | 2                       | 189                        | 5409                         | 80.31784                 | 101.9278           | 1.385907       | 780          | 1            | 48.6875         | 8.137549                              | 3                                    |
| bcB20      | 468.9908                    | 1946.305           | 23.00301       | 99304                   | 2                       | 173                        | 7159                         | 71.97056                 | 96.79316           | 1.14398        | 941          | 1            | 37.375          | 8.692136                              | 3                                    |
| bcB09      | 430.441                     | 1186.454           | 16.18009       | 43249                   | 2                       | 224                        | 5377                         | 84.28062                 | 107.3992           | 1.464641       | 998          | 1            | 51              | 8.310954                              | 3                                    |
| bcB08      | 393.7708                    | 1149.8             | 14.46433       | 38380                   | 2                       | 154                        | 6319                         | 76.13915                 | 105.1656           | 1.322969       | 843          | 1            | 38              | 7.464947                              | 2                                    |
| bcB05      | 403.9736                    | 2023.704           | 26.74837       | 110009                  | 2                       | 190                        | 5724                         | 81.34371                 | 99.26521           | 1.312041       | 810          | 1            | 52.59839        | 6.885744                              | 3                                    |
