# Supplementary material for: Genetic basis of allochronic differentiation in the fall armyworm
Source: PubMed Central journal article supplement (PMC5339952; doi:10.1186/s12862-017-0911-5), 2017-03-06
Supplement: 12862_2017_911_MOESM7_ESM.pdf [file 12862_2017_911_MOESM7_ESM.pdf]

## Additional file 7

Details of BLAST hits of *Sf* BC contigs to scaffolds of *Sf* genome and of BLAST hits of *Sf* genome scaffolds to *Bm* genome. Salmon shaded first field indicates a contig from backcross A; light-blue shaded first field indicates a contig from backcross B.

| BC18-Homolog | Bm Chr | hits | RAD contig                | Spodoptera scaffold | E-value To BmChr | % identity (RAD contigs to Sf scaffolds) | alignment length (RAD contigs to Spodoptera scaffolds) | e-value (RAD contigs to Spodoptera scaffolds) |
|--------------|--------|------|---------------------------|---------------------|------------------|------------------------------------------|--------------------------------------------------------|-----------------------------------------------|
| BC18-c01     | 3      | 2    | BC40q10_c23trans_contig1  | scaffold_1049       | 2E-169           |                                          |                                                        |                                               |
| BC18-c01     | 3      | 2    | BC18q10_c01trans_contig1  | scaffold_1049       | 2E-169           |                                          |                                                        | 3.00E-95                                      |
| BC18-c01     | 3      | 2    | BC40q10_c23trans_contig7  | scaffold_10803      | 4E-28            |                                          |                                                        |                                               |
| BC18-c01     | 3      |      | BC40q10_c23_contig3       | scaffold_1654       | 1E-39            | 93.0                                     | 71                                                     | 2.00E-21                                      |
| BC18-c01     | 3      | 2    | BC40q10_c23_contig6       | scaffold_1654       | 1E-39            | 95.1                                     | 101                                                    | 1.00E-37                                      |
| BC18-c01     | 3      | 2    | BC18q10_c01trans_contig1  | scaffold_219        | 0                | 99.5                                     | 195                                                    | 6.00E-97                                      |
| BC18-c01     | 3      | 2    | BC40q10_c23trans_contig1  | scaffold_219        | 0                | 99.5                                     | 195                                                    | 6.00E-97                                      |
| BC18-c01     | 3      |      | BC40q10_c23_contig9       | SFRU_RICE_015293    | 7E-95            | 100.0                                    | 208                                                    | 7.00E-106                                     |
| BC18-c01     | 3      | 2    | BC40q10_c23trans_contig7  | superscaffold_1050  | 0                | 93.8                                     | 194                                                    | 5.00E-78                                      |
| BC18-c01     | 3      |      | BC18q10_c01_contig1       | superscaffold_226   | 1E-36            | 94.3                                     | 175                                                    | 6.00E-69                                      |
| BC18-c01     | 3      |      | BC40q10_c23trans_contig3  | superscaffold_226   | 1E-36            | 91.2                                     | 125                                                    | 2.00E-40                                      |
| BC18-c01     | 6      | 2    | BC40q10_c23_contig10      | scaffold_11443      | 2E-25            |                                          |                                                        |                                               |
| BC18-c01     | 6      | 2    | BC40q10_c23_contig10      | scaffold_5988       | 2E-36            | 99.2                                     | 129                                                    | 2.00E-60                                      |
| BC18-c01     | 6      |      | BC40q10_c23_contig12      | scaffold_5988       | 2E-36            | 92.3                                     | 78                                                     | 1.00E-23                                      |
| BC18-c01     | 6      |      | BC40q10_c23_contig13      | scaffold_5988       | 2E-36            | 96.3                                     | 108                                                    | 1.00E-43                                      |
| BC18-c01     | 7      |      | BC40q10_c23trans_contig6  | scaffold_230        | 1E-35            | 99.2                                     | 125                                                    | 3.00E-58                                      |
| BC18-c01     | 12     | 2    | BC40q10_c23trans_contig10 | scaffold_24329      | 2E-31            | 95.5                                     | 111                                                    | 8.00E-44                                      |
| BC18-c01     | 12     |      | BC40q10_c23trans_contig9  | scaffold_24329      | 2E-31            | 97.3                                     | 149                                                    | 2.00E-66                                      |
| BC18-c01     | 12     | 2    | BC40q10_c23trans_contig10 | superscaffold_376   | 2E-88            |                                          |                                                        |                                               |
| BC18-c01     | 15     |      | BC40q10_c23_contig1       | superscaffold_633   | 0                | 87.4                                     | 198                                                    | 3.00E-55                                      |
| BC18-c01     | 16     | 2    | BC18q10_c01trans_contig5  | scaffold_6208       | 5E-13            | 96.5                                     | 260                                                    | 5.00E-119                                     |
| BC18-c01     | 16     | 2    | BC40q10_c23trans_contig15 | scaffold_6208       | 5E-13            | 95.6                                     | 249                                                    | 1.00E-109                                     |
| BC18-c01     | 16     |      | BC40q10_c23trans_contig19 | scaffold_6208       | 5E-13            | 95.9                                     | 97                                                     | 1.00E-36                                      |
| BC18-c01     | 17     |      | BC18q10_c01_contig3       | superscaffold_1033  | 1E-132           | 99.3                                     | 305                                                    | 3.00E-156                                     |
| BC18-c01     | 19     |      | BC40q10_c23trans_contig12 | SFRU_RICE_002423    | 0                | 92.7                                     | 96                                                     | 9.00E-32                                      |
| BC18-c01     | 21     |      | BC18q10_c01trans_contig3  | scaffold_9363       | 5E-              | 96.4                                     | 110                                                    | 6.00E-45                                      |

|          |               |   |                           |                    |        |       |     |           |
|----------|---------------|---|---------------------------|--------------------|--------|-------|-----|-----------|
|          |               |   |                           |                    | 113    |       |     |           |
| BC18-c01 | 21            |   | BC18q10_c01trans_contig9  | scaffold_9363      | 5E-113 | 98.2  | 169 | 3.00E-79  |
| BC18-c01 | 24            | 2 | BC40q10_c23trans_contig17 | scaffold_1         | 0      | 99.1  | 107 | 3.00E-48  |
| BC18-c01 | 24            | 2 | BC40q10_c23_contig2       | scaffold_6298      | 4E-13  |       |     | 4.00E-47  |
| BC18-c01 | 25            |   | BC40q10_c23trans_contig16 | scaffold_9864      | 0      | 100.0 | 171 | 3.00E-85  |
| BC18-c01 | 28            | 2 | BC40q10_c23trans_contig14 | scaffold_722       | 1E-37  | 95.2  | 188 | 1.00E-79  |
| BC18-c01 | 28            |   | BC40q10_c23trans_contig4  | superscaffold_75   | 5E-91  | 95.5  | 199 | 1.00E-83  |
| BC18-c01 | 25<br>&<br>28 | 2 | BC40q10_c23_contig2       | superscaffold_194  |        | 97.5  | 122 | 3.00E-53  |
| BC18-c01 | 25<br>&<br>28 |   | BC40q10_c23_contig5       | superscaffold_194  |        | 97.3  | 185 | 1.00E-84  |
|          |               |   |                           |                    |        |       |     |           |
| BC18-c02 | 4             |   | BC40q10_c17_contig9       | scaffold_15885     | 2E-30  | 92.9  | 56  | 3.00E-14  |
| BC18-c02 | 9             |   | BC40q10_c17_contig10      | scaffold_8993      | 0      | 93.3  | 89  | 5.00E-30  |
| BC18-c02 | 14            | 2 | BC18q10_c03trans_contig2  | scaffold_183       | 1E-174 |       |     |           |
| BC18-c02 | 14            | 2 | BC18q10_c03_contig1       | scaffold_1892      | 3E-44  |       |     |           |
| BC18-c02 | 14            | 2 | BC18q10_c03trans_contig2  | scaffold_280       | 0      | 86.8  | 280 | 4.00E-81  |
| BC18-c02 | 14            | 2 | BC18q10_c03_contig1       | scaffold_7229      | 7E-67  | 99.5  | 211 | 9.00E-106 |
| BC18-c02 | 15            |   | BC18q10_c02_contig11      | scaffold_10118     | 3E-66  | 91.1  | 135 | 2.00E-45  |
| BC18-c02 | 15            |   | BC18q10_c02_contig12      | scaffold_10118     | 3E-66  | 92.4  | 158 | 4.00E-58  |
| BC18-c02 | 15            |   | BC18q10_c02_contig9       | scaffold_3534      | 0      | 95.2  | 439 | 0.0       |
| BC18-c02 | 25            |   | BC18q10_c02_contig1       | scaffold_11521     | 1E-36  | 94.6  | 110 | 1.00E-41  |
| BC18-c02 | 25            |   | BC40q10_c17_contig3       | scaffold_11521     | 1E-36  | 91.9  | 123 | 4.00E-42  |
| BC18-c02 | 25            |   | BC40q10_c17_contig5       | scaffold_1278      | 7E-96  | 92.5  | 133 | 5.00E-46  |
| BC18-c02 | 25            |   | BC40q10_c17trans_contig8  | scaffold_1278      | 7E-96  | 91.4  | 104 | 9.00E-33  |
| BC18-c02 | 25            |   | BC18q10_c02_contig4       | scaffold_13056     | 1E-34  | 94.7  | 170 | 1.00E-69  |
| BC18-c02 | 25            |   | BC18q10_c02_contig6       | scaffold_13056     | 1E-34  | 97.7  | 129 | 5.00E-57  |
| BC18-c02 | 25            |   | BC40q10_c17_contig7       | scaffold_34805     | 8E-25  | 89.1  | 110 | 4.00E-31  |
| BC18-c02 | 25            |   | BC40q10_c17_contig2       | scaffold_4573      | 0      | 87.1  | 140 | 5.00E-37  |
| BC18-c02 | 25            |   | BC18q10_c02_contig8       | scaffold_5684      | 6E-78  | 96.1  | 155 | 2.00E-66  |
| BC18-c02 | 25            |   | BC40q10_c17_contig12      | scaffold_5684      | 6E-78  | 96.1  | 155 | 2.00E-66  |
| BC18-c02 | 25            |   | BC40q10_c17trans_contig12 | scaffold_577       | 0      | 94.9  | 117 | 2.00E-45  |
| BC18-c02 | 25            |   | BC40q10_c17_contig1       | scaffold_6053      | 2E-111 | 97.0  | 100 | 4.00E-41  |
| BC18-c02 | 25            |   | BC40q10_c17_contig8       | scaffold_6627      | 1E-54  | 99.0  | 104 | 1.00E-46  |
| BC18-c02 | 25            |   | BC18q10_c02_contig10      | scaffold_7664      | 5E-31  | 89.8  | 108 | 6.00E-31  |
| BC18-c02 | 25            |   | BC18q10_c02trans_contig1  | scaffold_7664      | 5E-31  | 91.4  | 280 | 6.00E-104 |
| BC18-c02 | 25            |   | BC18q10_c02_contig3       | scaffold_8666      | 5E-33  | 94.1  | 152 | 9.00E-60  |
| BC18-c02 | 25            |   | BC18q10_c02_contig7       | SFRU_RICE_000641   | 2E-116 | 100.0 | 104 | 2.00E-48  |
| BC18-c02 | 25            |   | BC40q10_c17trans_contig3  | superscaffold_1210 | 2E-53  | 97.9  | 95  | 5.00E-40  |
| BC18-c02 | 25            |   | BC40q10_c17trans_contig5  | superscaffold_1210 | 2E-53  | 96.3  | 109 | 2.00E-44  |
| BC18-c02 | 28            |   | BC40q10_c17_contig13      | scaffold_722       | 1E-37  | 94.2  | 120 | 2.00E-45  |
|          |               |   |                           |                    |        |       |     |           |
| BC18-c03 | 4             |   | BC40q10_c18trans_contig1  | superscaffold_468  | 6E-157 | 92.9  | 226 | 3.00E-86  |

|          |    |     |                           |                    |        |       |     |           |
|----------|----|-----|---------------------------|--------------------|--------|-------|-----|-----------|
| BC18-c03 | 14 | 2   | BC40q10_c18_contig2       | scaffold_1139      | 3E-33  | 99.3  | 142 | 1.00E-67  |
| BC18-c03 | 14 | 2   | BC40q10_c18_contig3       | scaffold_1892      | 3E-44  |       |     |           |
| BC18-c03 | 14 | 2   | BC40q10_c18_contig2       | scaffold_235       | 2E-36  |       |     | 1.00E-67  |
| BC18-c03 | 14 | 2   | BC40q10_c18_contig3       | scaffold_7229      | 7E-67  | 99.5  | 211 | 9.00E-106 |
| BC18-c03 | 14 |     | BC40q10_c18trans_contig3  | scaffold_8388      | 1E-34  | 94.3  | 122 | 5.00E-46  |
| BC18-c03 | 18 |     | BC40q10_c18_contig6       | superscaffold_1125 | 1E-76  | 98.2  | 113 | 6.00E-50  |
| BC18-c03 | 18 |     | BC40q10_c18_contig8       | superscaffold_1125 | 1E-76  | 98.4  | 253 | 5.00E-124 |
| BC18-c03 | 23 |     | BC40q10_c18_contig5       | SFRU_RICE_004426   | 4E-18  | 85.7  | 70  | 5.00E-11  |
| BC18-c03 | 24 |     | BC40q10_c18_contig7       | scaffold_2271      | 1E-130 | 83.6  | 250 | 1.00E-55  |
| BC18-c03 | 25 |     | BC40q10_c18trans_contig2  | scaffold_11728     | 1E-23  | 86.9  | 130 | 2.00E-33  |
|          |    |     |                           |                    |        |       |     |           |
| BC18-c04 | 16 |     | BC40q10_c02trans_contig3  | scaffold_1450      | 1E-107 | 98.5  | 196 | 4.00E-94  |
| BC18-c04 | 16 |     | BC40q10_c02trans_contig4  | scaffold_1450      | 1E-107 | 96.5  | 114 | 1.00E-46  |
| BC18-c04 | 16 |     | BC40q10_c02_contig4       | scaffold_43652     | 2E-23  | 94.0  | 133 | 6.00E-51  |
| BC18-c04 | 16 |     | BC40q10_c02_contig3       | superscaffold_724  | 7E-136 | 92.7  | 124 | 2.00E-44  |
| BC18-c04 | 16 |     | BC18q10_c04trans_contig1  | superscaffold_969  | 2E-160 | 96.2  | 132 | 4.00E-55  |
| BC18-c04 | 16 | 2   | BC18q10_c04trans_contig6  | superscaffold_969  | 2E-160 | 97.4  | 189 | 6.00E-87  |
| BC18-c04 | 17 | bad | BC40q10_c02trans_contig1  | SFRU_RICE_023912   | 1E-48  | 79.1  | 311 | 4.00E-45  |
| BC18-c04 | 23 |     | BC18q10_c04trans_contig2  | SFRU_RICE_003538   | 4E-29  | 86.6  | 97  | 4.00E-21  |
|          |    |     |                           |                    |        |       |     |           |
| BC18-c05 | 3  | 2   | BC18q10_c05_contig5       | scaffold_9547      | 3E-79  |       |     |           |
| BC18-c05 | 3  | 2   | BC18q10_c05_contig5       | superscaffold_1050 | 0      | 97.1  | 104 | 2.00E-43  |
| BC18-c05 | 3  |     | BC18q10_c05_contig2       | superscaffold_886  | 0      | 98.1  | 107 | 1.00E-46  |
| BC18-c05 | 5  |     | BC18q10_c05trans_contig1  | superscaffold_84   | 0      | 99.3  | 301 | 6.00E-154 |
| BC18-c05 | 6  | 2   | BC40q10_c05_contig16      | scaffold_11443     | 2E-25  |       |     |           |
| BC18-c05 | 6  | 2   | BC40q10_c05_contig15      | scaffold_3625      | 7E-16  |       |     |           |
| BC18-c05 | 6  | 2   | BC40q10_c05_contig16      | scaffold_5988      | 2E-36  | 100.0 | 130 | 2.00E-62  |
| BC18-c05 | 6  | 2   | BC40q10_c05_contig15      | superscaffold_1093 | 7E-33  | 95.2  | 105 | 2.00E-40  |
| BC18-c05 | 8  |     | BC40q10_c05trans_contig9  | scaffold_4055      | 8E-103 | 98.0  | 303 | 2.00E-148 |
| BC18-c05 | 8  |     | BC40q10_c05_contig13      | scaffold_583       | 2E-59  | 85.0  | 180 | 5.00E-43  |
| BC18-c05 | 8  |     | BC40q10_c05_contig7       | scaffold_583       | 2E-59  | 95.3  | 149 | 2.00E-60  |
| BC18-c05 | 8  |     | BC40q10_c05_contig8       | scaffold_583       | 2E-59  | 89.2  | 120 | 1.00E-32  |
| BC18-c05 | 8  |     | BC40q10_c05_contig4       | scaffold_8236      | 1E-28  | 100.0 | 134 | 7.00E-65  |
| BC18-c05 | 8  |     | BC40q10_c05trans_contig7  | scaffold_8236      | 1E-28  | 83.2  | 279 | 4.00E-56  |
| BC18-c05 | 11 | vs  | BC40q10_c05_contig6       | scaffold_2866      | 1E-20  | 100.0 | 44  | 1.00E-14  |
| BC18-c05 | 15 |     | BC40q10_c05trans_contig10 | superscaffold_1036 | 0      | 93.6  | 204 | 4.00E-79  |
| BC18-c05 | 16 |     | BC40q10_c05trans_contig1  | superscaffold_354  | 0      | 85.5  | 220 | 1.00E-54  |
| BC18-c05 | 16 |     | BC40q10_c05_contig17      | superscaffold_831  | 1E-21  | 99.6  | 251 | 6.00E-128 |
| BC18-c05 | 20 |     | BC40q10_c05trans_contig3  | scaffold_25506     | 1E-22  | 89.2  | 74  | 1.00E-17  |
| BC18-c05 | 20 |     | BC40q10_c05trans_contig8  | scaffold_25602     | 1E-22  | 100.0 | 28  | 6.00E-06  |
| BC18-c05 | 20 |     | BC40q10_c05_contig9       | scaffold_36821     | 2E-11  | 92.6  | 108 | 4.00E-37  |
| BC18-c05 | 20 |     | BC40q10_c05_contig3       | scaffold_6173      | 7E-63  | 100.0 | 119 | 1.00E-56  |

|          |    |   |                          |                    |        |       |     |           |
|----------|----|---|--------------------------|--------------------|--------|-------|-----|-----------|
| BC18-c05 | 20 |   | BC40q10_c05_contig5      | scaffold_6173      | 7E-63  | 99.2  | 122 | 1.00E-56  |
| BC18-c05 | 20 |   | BC18q10_c05_contig4      | scaffold_6323      | 4E-40  | 97.2  | 108 | 2.00E-45  |
| BC18-c05 | 20 |   | BC40q10_c05_contig1      | scaffold_7655      | 3E-108 | 92.1  | 139 | 3.00E-49  |
| BC18-c05 | 20 |   | BC40q10_c05_contig12     | SFRU_RICE_004799   | 1E-24  | 100.0 | 124 | 2.00E-59  |
| BC18-c05 | 20 |   | BC40q10_c05_contig10     | superscaffold_460  | 1E-126 | 99.4  | 167 | 2.00E-81  |
| BC18-c05 | 23 |   | BC40q10_c05trans_contig2 | superscaffold_600  | 1E-120 | 98.4  | 250 | 2.00E-122 |
|          |    |   |                          |                    |        |       |     |           |
| BC18-c06 | 8  |   | BC18q10_c06trans_contig1 | scaffold_4055      | 8E-103 | 98.3  | 177 | 1.00E-83  |
| BC18-c06 | 8  |   | BC18q10_c06trans_contig4 | scaffold_4055      | 8E-103 | 97.1  | 174 | 1.00E-78  |
| BC18-c06 | 8  |   | BC18q10_c06_contig1      | scaffold_91        | 1E-51  | 96.9  | 64  | 1.00E-22  |
| BC18-c06 | 8  |   | BC18q10_c06_contig2      | scaffold_91        | 1E-51  | 99.1  | 227 | 2.00E-112 |
| BC18-c06 | 18 |   | BC18q10_c06_contig6      | superscaffold_823  | 2E-151 | 90.2  | 92  | 5.00E-26  |
| BC18-c06 | 22 |   | BC40q10_c06_contig1      | scaffold_5666      | 4E-90  | 97.5  | 283 | 1.00E-135 |
| BC18-c06 | 22 |   | BC40q10_c06_contig6      | scaffold_6239      | 0      | 97.4  | 156 | 2.00E-70  |
| BC18-c06 | 22 |   | BC40q10_c06trans_contig1 | scaffold_6239      | 0      | 95.4  | 259 | 2.00E-113 |
| BC18-c06 | 22 |   | BC40q10_c06_contig5      | scaffold_730       | 9E-33  | 98.7  | 236 | 3.00E-116 |
| BC18-c06 | 22 |   | BC40q10_c06_contig4      | superscaffold_430  | 3E-79  | 92.0  | 149 | 4.00E-53  |
| BC18-c06 | 22 |   | BC18q10_c06_contig3      | superscaffold_701  | 1E-21  | 92.3  | 182 | 8.00E-66  |
| BC18-c06 | 22 |   | BC18q10_c06trans_contig2 | superscaffold_701  | 1E-21  | 93.9  | 164 | 1.00E-63  |
| BC18-c06 | 22 |   | BC18q10_c06trans_contig3 | superscaffold_701  | 1E-21  | 97.1  | 206 | 4.00E-94  |
|          |    |   |                          |                    |        |       |     |           |
| BC18-c08 | 5  |   | BC40q10_c08_contig10     | scaffold_777       | 0      | 87.1  | 101 | 1.00E-22  |
| BC18-c08 | 5  |   | BC40q10_c08_contig11     | scaffold_777       | 0      | 95.0  | 218 | 7.00E-92  |
| BC18-c08 | 14 | 2 | BC40q10_c08trans_contig3 | scaffold_1892      | 3E-44  |       |     |           |
| BC18-c08 | 14 | 2 | BC40q10_c08trans_contig3 | scaffold_7229      | 7E-67  | 98.4  | 375 | 0         |
| BC18-c08 | 17 |   | BC40q10_c08trans_contig5 | scaffold_7132      | 6E-54  | 96.7  | 122 | 1.00E-51  |
| BC18-c08 | 18 | 3 | BC40q10_c08trans_contig8 | superscaffold_1100 | 3E-39  | 99.5  | 190 | 4.00E-94  |
| BC18-c08 | 19 |   | BC18q10_c08_contig4      | scaffold_12179     | 7E-143 | 97.6  | 125 | 7.00E-55  |
| BC18-c08 | 19 |   | BC40q10_c08_contig2      | scaffold_158       | 0      | 93.0  | 129 | 8.00E-47  |
| BC18-c08 | 19 | 2 | BC18q10_c08_contig7      | scaffold_3357      | 7E-112 | 99.4  | 161 | 5.00E-78  |
| BC18-c08 | 19 |   | BC18q10_c08_contig8      | scaffold_3357      | 7E-112 | 91.7  | 133 | 2.00E-44  |
| BC18-c08 | 19 | 2 | BC40q10_c08_contig7      | scaffold_3357      | 7E-112 | 99.4  | 161 | 5.00E-78  |
| BC18-c08 | 19 |   | BC18q10_c08_contig2      | scaffold_7592      | 1E-60  | 97.4  | 234 | 1.00E-109 |
| BC18-c08 | 19 |   | BC18q10_c08_contig6      | SFRU_RICE_004475   | 3E-31  | 91.4  | 105 | 6.00E-34  |
| BC18-c08 | 19 |   | BC18q10_c08_contig3      | SFRU_RICE_007174   | 7E-67  | 88.8  | 98  | 1.00E-26  |
| BC18-c08 | 19 |   | BC40q10_c08_contig8      | superscaffold_107  | 2E-109 | 97.0  | 232 | 2.00E-107 |
| BC18-c08 | 19 |   | BC40q10_c08_contig9      | superscaffold_113  | 0      | 97.3  | 218 | 3.00E-101 |
| BC18-c08 | 19 | 2 | BC40q10_c08_contig7      | superscaffold_668  | 1E-76  |       |     |           |
| BC18-c08 | 19 |   | BC18q10_c08trans_contig1 | superscaffold_896  | 1E-110 | 93.3  | 75  | 1.00E-23  |
| BC18-c08 | 19 |   | BC18q10_c08trans_contig2 | superscaffold_896  | 1E-110 | 96.2  | 130 | 3.00E-54  |

|          |    |   |                           |                    |        |       |     |           |
|----------|----|---|---------------------------|--------------------|--------|-------|-----|-----------|
| BC18-c08 | 22 | 2 | BC18q10_c08_contig7       | superscaffold_66   | 0      |       |     |           |
| BC18-c08 | 23 | 3 | BC40q10_c08trans_contig8  | scaffold_410       | 4E-175 |       |     | 1.00E-83  |
| BC18-c08 | 24 |   | BC40q10_c08trans_contig7  | scaffold_1         | 0      | 88.9  | 189 | 6.00E-57  |
| BC18-c08 | 27 | 2 | BC40q10_c08trans_contig1  | scaffold_13102     | 2E-24  |       |     |           |
| BC18-c08 | 27 | 2 | BC40q10_c08trans_contig1  | superscaffold_1097 | 8E-79  | 91.0  | 200 | 4.00E-70  |
| BC18-c08 | 28 | 3 | BC40q10_c08trans_contig8  | superscaffold_1103 | 5E-37  |       |     | 2.00E-92  |
|          |    |   |                           |                    |        |       |     |           |
| BC18-c09 | 5  |   | BC40q10_c09_contig5       | scaffold_1270      | 1E-130 | 98.7  | 159 | 8.00E-75  |
| BC18-c09 | 5  |   | BC40q10_c09trans_contig17 | scaffold_13111     | 4E-40  | 95.8  | 71  | 5.00E-25  |
| BC18-c09 | 5  |   | BC40q10_c09trans_contig1  | scaffold_14779     | 5E-81  | 100.0 | 121 | 1.00E-57  |
| BC18-c09 | 5  |   | BC18q10_c09trans_contig1  | scaffold_24882     | 1E-64  | 99.5  | 212 | 2.00E-106 |
| BC18-c09 | 5  |   | BC40q10_c09_contig2       | scaffold_2538      | 3E-87  | 99.1  | 232 | 1.00E-115 |
| BC18-c09 | 5  |   | BC40q10_c09trans_contig6  | scaffold_3565      | 1E-34  | 100.0 | 109 | 4.00E-51  |
| BC18-c09 | 5  |   | BC40q10_c09trans_contig5  | scaffold_4752      | 9E-43  | 97.4  | 114 | 8.00E-49  |
| BC18-c09 | 5  |   | BC40q10_c09trans_contig7  | scaffold_4752      | 9E-43  | 100.0 | 112 | 1.00E-52  |
| BC18-c09 | 5  |   | BC40q10_c09trans_contig9  | scaffold_4752      | 9E-43  | 94.5  | 73  | 9.00E-24  |
| BC18-c09 | 5  |   | BC40q10_c09trans_contig3  | scaffold_8188      | 3E-84  | 93.9  | 132 | 9.00E-49  |
| BC18-c09 | 5  |   | BC40q10_c09trans_contig19 | scaffold_9763      | 5E-26  | 97.3  | 110 | 4.00E-46  |
| BC18-c09 | 5  |   | BC18q10_c09trans_contig3  | SFRU_RICE_005226   | 2E-92  | 95.9  | 121 | 2.00E-49  |
| BC18-c09 | 5  |   | BC40q10_c09trans_contig10 | superscaffold_1147 | 1E-47  | 92.6  | 122 | 3.00E-43  |
| BC18-c09 | 5  |   | BC18q10_c09trans_contig2  | superscaffold_133  | 2E-120 | 95.3  | 148 | 3.00E-59  |
| BC18-c09 | 5  |   | BC40q10_c09trans_contig15 | superscaffold_133  | 2E-120 | 95.3  | 148 | 3.00E-59  |
| BC18-c09 | 5  |   | BC40q10_c09_contig3       | superscaffold_84   | 0      | 99.3  | 301 | 6.00E-154 |
| BC18-c09 | 5  |   | BC40q10_c09trans_contig12 | superscaffold_913  | 5E-153 | 98.3  | 114 | 2.00E-50  |
| BC18-c09 | 7  |   | BC18q10_c09_contig5       | scaffold_230       | 1E-35  | 100.0 | 67  | 2.00E-27  |
| BC18-c09 | 10 |   | BC40q10_c09_contig4       | superscaffold_870  | 7E-116 | 82.5  | 171 | 1.00E-30  |
| BC18-c09 | 16 |   | BC18q10_c09_contig3       | scaffold_6208      | 5E-13  | 94.3  | 262 | 4.00E-110 |
| BC18-c09 | 22 |   | BC40q10_c09trans_contig13 | scaffold_8948      | 4E-141 | 94.4  | 214 | 4.00E-89  |
| BC18-c09 | 26 |   | BC18q10_c09_contig4       | scaffold_468       | 1E-21  | 98.2  | 168 | 4.00E-78  |
| BC18-c09 | 27 |   | BC40q10_c09trans_contig8  | scaffold_586       | 0      | 98.2  | 110 | 3.00E-48  |
|          |    |   |                           |                    |        |       |     |           |
| BC18-c10 | 1  |   | BC40q10_c11trans_contig1  | scaffold_7564      | 9E-67  | 100.0 | 143 | 8.00E-70  |
| BC18-c10 | 1  |   | BC40q10_c11trans_contig4  | scaffold_7564      | 9E-67  | 97.5  | 118 | 5.00E-51  |
| BC18-c10 | 3  |   | BC40q10_c11trans_contig3  | superscaffold_886  | 0      | 99.4  | 331 | 1.00E-170 |
| BC18-c10 | 5  | 2 | BC40q10_c11_contig13      | scaffold_185       | 0      |       |     | 6.00E-56  |
| BC18-c10 | 7  |   | BC40q10_c11_contig7       | scaffold_27649     | 2E-45  | 95.7  | 161 | 4.00E-68  |
| BC18-c10 | 8  |   | BC40q10_c11_contig14      | SFRU_RICE_002566   | 2E-39  | 87.7  | 138 | 5.00E-36  |
| BC18-c10 | 24 | 2 | BC40q10_c11_contig13      | scaffold_2087      | 2E-144 | 100.0 | 146 | 2.00E-71  |
| BC18-c10 | 28 |   | BC40q10_c11_contig16      | scaffold_17507     | 3E-27  | 97.3  | 149 | 2.00E-66  |
| BC18-c10 | 28 |   | BC40q10_c11_contig5       | scaffold_37137     | 4E-30  | 95.4  | 129 | 5.00E-52  |
| BC18-c10 | 28 | 2 | BC40q10_c11_contig4       | scaffold_39475     | 1E-41  | 98.1  | 106 | 5.00E-46  |
| BC18-c10 | 28 |   | BC40q10_c11_contig3       | superscaffold_1189 | 0      | 99.1  | 319 | 3.00E-162 |

|          |               |   |                          |                    |        |       |     |           |
|----------|---------------|---|--------------------------|--------------------|--------|-------|-----|-----------|
| BC18-c10 | 28            |   | BC18q10_c10_contig1      | superscaffold_75   | 5E-91  | 95.9  | 145 | 8.00E-60  |
| BC18-c10 | 28            |   | BC40q10_c11_contig1      | superscaffold_75   | 5E-91  | 95.0  | 160 | 7.00E-66  |
| BC18-c10 | 28            |   | BC40q10_c11_contig8      | superscaffold_75   | 5E-91  | 97.0  | 101 | 1.00E-41  |
| BC18-c10 | 11<br>&1<br>8 |   | BC40q10_c11_contig11     | scaffold_598       |        | 91.9  | 99  | 3.00E-32  |
| BC18-c11 | 25<br>&<br>28 |   | BC18q10_c11trans_contig1 | superscaffold_194  |        | 99.4  | 328 | 6.00E-169 |
| BC18-c12 | 23            |   | BC18q10_c12_contig1      | scaffold_462       | 0      | 88.0  | 83  | 9.00E-18  |
| BC18-c12 | 23            |   | BC40q10_c13_contig1      | scaffold_462       | 0      | 83.6  | 146 | 2.00E-30  |
| BC18-c13 | 7             |   | BC18q10_c13_contig6      | scaffold_8962      | 4E-38  | 88.9  | 117 | 4.00E-32  |
| BC18-c13 | 18            | 3 | BC40q10_c14_contig6      | superscaffold_1100 | 3E-39  |       |     | 2.00E-71  |
| BC18-c13 | 18            |   | BC18q10_c13_contig5      | superscaffold_239  | 0      | 96.5  | 345 | 4.00E-161 |
| BC18-c13 | 18            |   | BC18q10_c13_contig7      | superscaffold_515  | 0      | 95.7  | 115 | 2.00E-45  |
| BC18-c13 | 18            |   | BC40q10_c14_contig1      | superscaffold_618  | 2E-46  | 98.0  | 153 | 2.00E-70  |
| BC18-c13 | 23            | 3 | BC40q10_c14_contig6      | scaffold_410       | 4E-175 |       |     | 2.00E-71  |
| BC18-c13 | 28            | 3 | BC40q10_c14_contig6      | superscaffold_1103 | 5E-37  | 99.3  | 152 | 4.00E-73  |
| BC18-c14 | 7             |   | BC40q10_c16trans_contig6 | superscaffold_1108 | 3E-26  | 89.0  | 209 | 3.00E-67  |
| BC18-c14 | 9             |   | BC18q10_c14_contig6      | superscaffold_760  | 2E-52  | 90.5  | 42  | 9.00E-07  |
| BC18-c14 | 10            |   | BC18q10_c14_contig11     | scaffold_1144      | 4E-140 | 99.1  | 115 | 1.00E-52  |
| BC18-c14 | 10            |   | BC18q10_c14_contig13     | scaffold_1144      | 4E-140 | 100.0 | 105 | 7.00E-49  |
| BC18-c14 | 10            |   | BC40q10_c16trans_contig2 | scaffold_1194      | 3E-67  | 100.0 | 124 | 2.00E-59  |
| BC18-c14 | 10            |   | BC18q10_c14_contig10     | scaffold_2074      | 1E-54  | 98.6  | 217 | 1.00E-104 |
| BC18-c14 | 10            |   | BC40q10_c16_contig4      | scaffold_228       | 0      | 97.4  | 194 | 1.00E-89  |
| BC18-c14 | 10            |   | BC18q10_c14_contig18     | scaffold_2775      | 4E-70  | 95.1  | 329 | 5.00E-145 |
| BC18-c14 | 10            |   | BC40q10_c16_contig5      | scaffold_2775      | 4E-70  | 95.1  | 329 | 5.00E-145 |
| BC18-c14 | 10            |   | BC18q10_c14_contig17     | scaffold_2884      | 1E-11  | 98.2  | 332 | 6.00E-164 |
| BC18-c14 | 10            |   | BC18q10_c14_contig5      | scaffold_5534      | 0      | 100.0 | 120 | 4.00E-57  |
| BC18-c14 | 10            |   | BC18q10_c14trans_contig2 | scaffold_5534      | 0      | 94.7  | 150 | 8.00E-60  |
| BC18-c14 | 10            |   | BC18q10_c14trans_contig3 | SFRU_RICE_008443   | 0      | 89.7  | 107 | 1.00E-31  |
| BC18-c14 | 10            |   | BC40q10_c16trans_contig1 | superscaffold_486  | 0      | 98.3  | 115 | 5.00E-51  |
| BC18-c14 | 10            |   | BC40q10_c16trans_contig3 | superscaffold_486  | 0      | 99.1  | 107 | 3.00E-48  |
| BC18-c14 | 15            |   | BC18q10_c14_contig2      | superscaffold_462  | 0      | 97.0  | 99  | 1.00E-40  |
| BC18-c14 | 24            |   | BC18q10_c14_contig1      | scaffold_21147     | 1E-13  | 87.5  | 72  | 6.00E-15  |
| BC18-c14 | 23<br>&2<br>7 |   | BC40q10_c16trans_contig7 | superscaffold_1011 |        | 98.0  | 99  | 3.00E-42  |
| BC18-c15 | 7             |   | BC40q10_c01trans_contig5 | scaffold_8962      | 4E-38  | 96.2  | 131 | 3.00E-54  |
| BC18-c15 | 7             |   | BC40q10_c01trans_contig2 | SFRU_RICE_008146   | 3E-28  | 100.0 | 166 | 1.00E-82  |
| BC18-c15 | 8             |   | BC40q10_c01_contig4      | scaffold_14728     | 1E-132 | 83.7  | 202 | 6.00E-43  |
| BC18-c15 | 8             |   | BC18q10_c15_contig1      | scaffold_65        | 0      | 85.4  | 123 | 5.00E-28  |

|          |               |    |                          |                    |        |       |     |           |
|----------|---------------|----|--------------------------|--------------------|--------|-------|-----|-----------|
| BC18-c15 | 8             |    | BC40q10_c01_contig11     | scaffold_91        | 1E-51  | 99.1  | 227 | 2.00E-112 |
| BC18-c15 | 8             |    | BC40q10_c01_contig8      | scaffold_91        | 1E-51  | 96.9  | 64  | 1.00E-22  |
| BC18-c15 | 8             |    | BC40q10_c01_contig12     | superscaffold_986  | 2E-153 | 93.1  | 216 | 2.00E-83  |
| BC18-c15 | 8             |    | BC40q10_c01_contig19     | superscaffold_986  | 2E-153 | 95.2  | 209 | 5.00E-88  |
| BC18-c15 | 14            | vs | BC40q10_c01_contig10     | scaffold_1892      | 3E-44  | 100.0 | 39  | 4.00E-12  |
| BC18-c15 | 14            |    | BC40q10_c01_contig13     | scaffold_1892      | 3E-44  | 97.0  | 165 | 1.00E-73  |
| BC18-c15 | 14            |    | BC40q10_c01_contig17     | scaffold_1892      | 3E-44  | 93.7  | 95  | 3.00E-33  |
| BC18-c15 | 14            |    | BC40q10_c01trans_contig4 | scaffold_1892      | 3E-44  | 98.1  | 310 | 3.00E-152 |
| BC18-c15 | 17            |    | BC40q10_c01trans_contig1 | scaffold_42011     | 7E-24  | 96.2  | 239 | 1.00E-105 |
| BC18-c15 | 22            |    | BC40q10_c01trans_contig3 | superscaffold_430  | 3E-79  | 92.9  | 141 | 5.00E-52  |
| BC18-c15 | 24            |    | BC40q10_c01_contig16     | scaffold_1630      | 2E-68  | 93.3  | 224 | 8.00E-87  |
| BC18-c15 | 27            | 2  | BC18q10_c15_contig2      | SFRU_RICE_008260   | 2E-147 |       |     |           |
| BC18-c15 | 27            | 2  | BC18q10_c15_contig2      | SFRU_RICE_020820   | 3E-28  | 88.7  | 115 | 5.00E-32  |
|          |               |    |                          |                    |        |       |     |           |
| BC18-c16 | 9             |    | BC40q10_c03_contig4      | scaffold_8938      | 6E-50  | 87.3  | 110 | 6.00E-26  |
| BC18-c16 | 9             |    | BC40q10_c03_contig9      | scaffold_8938      | 6E-50  | 99.3  | 144 | 1.00E-68  |
| BC18-c16 | 9             |    | BC18q10_c16trans_contig2 | SFRU_RICE_016343   | 0      | 90.3  | 154 | 2.00E-50  |
| BC18-c16 | 9             |    | BC18q10_c16trans_contig1 | superscaffold_1206 | 0      | 97.6  | 169 | 2.00E-77  |
| BC18-c16 | 9             |    | BC40q10_c03_contig2      | superscaffold_760  | 2E-52  | 94.5  | 127 | 2.00E-49  |
| BC18-c16 | 9             |    | BC40q10_c03_contig7      | superscaffold_94   | 0      | 98.1  | 104 | 5.00E-45  |
| BC18-c16 | 22            | 2  | BC40q10_c03trans_contig1 | scaffold_9330      | 1E-40  |       |     |           |
| BC18-c16 | 22            | 2  | BC40q10_c03trans_contig1 | superscaffold_37   | 1E-41  | 90.9  | 164 | 6.00E-55  |
| BC18-c16 | 22            |    | BC40q10_c03trans_contig2 | superscaffold_701  | 1E-21  | 93.9  | 164 | 1.00E-63  |
| BC18-c16 | 22            |    | BC40q10_c03trans_contig3 | superscaffold_701  | 1E-21  | 97.1  | 206 | 4.00E-94  |
| BC18-c16 | 24            | 2  | BC40q10_c03_contig10     | scaffold_6298      | 4E-13  |       |     | 4.00E-23  |
| BC18-c16 | 25<br>&2<br>8 | 2  | BC40q10_c03_contig10     | superscaffold_194  |        | 98.5  | 136 | 1.00E-62  |
|          |               |    |                          |                    |        |       |     |           |
| BC18-c17 | 1             |    | BC18q10_c17_contig12     | scaffold_5532      | 9E-110 | 97.0  | 131 | 2.00E-56  |
| BC18-c17 | 1             |    | BC18q10_c17_contig27     | scaffold_5532      | 9E-110 | 96.8  | 94  | 8.00E-38  |
| BC18-c17 | 4             |    | BC18q10_c17_contig22     | scaffold_105       | 3E-133 | 89.3  | 150 | 8.00E-45  |
| BC18-c17 | 4             |    | BC18q10_c17_contig24     | scaffold_105       | 3E-133 | 91.2  | 260 | 2.00E-92  |
| BC18-c17 | 4             | 2  | BC40q10_c20trans_contig3 | scaffold_5327      | 3E-21  | 96.1  | 51  | 4.00E-15  |
| BC18-c17 | 6             |    | BC18q10_c17trans_contig1 | scaffold_20856     | 2E-44  | 94.0  | 199 | 1.00E-78  |
| BC18-c17 | 6             |    | BC18q10_c17trans_contig4 | scaffold_20856     | 2E-44  | 97.0  | 131 | 5.00E-56  |
| BC18-c17 | 7             |    | BC18q10_c17_contig14     | superscaffold_336  | 0      | 100.0 | 144 | 2.00E-70  |
| BC18-c17 | 9             |    | BC40q10_c20_contig11     | scaffold_16039     | 2E-119 | 99.0  | 103 | 4.00E-46  |
| BC18-c17 | 15            |    | BC18q10_c17_contig18     | scaffold_5685      | 1E-33  | 100.0 | 221 | 5.00E-113 |
| BC18-c17 | 15            |    | BC40q10_c20_contig1      | scaffold_5685      | 1E-33  | 100.0 | 169 | 3.00E-84  |
| BC18-c17 | 15            |    | BC40q10_c20_contig13     | scaffold_5685      | 1E-33  | 99.0  | 103 | 4.00E-46  |
| BC18-c17 | 15            |    | BC18q10_c17_contig9      | superscaffold_390  | 5E-101 | 90.9  | 187 | 5.00E-63  |

|          |    |    |                           |                   |        |       |     |           |
|----------|----|----|---------------------------|-------------------|--------|-------|-----|-----------|
| BC18-c17 | 15 |    | BC18q10_c17_contig25      | superscaffold_493 | 2E-175 | 95.0  | 99  | 5.00E-37  |
| BC18-c17 | 16 | 2  | BC18q10_c17trans_contig11 | scaffold_6208     | 5E-13  | 96.4  | 195 | 2.00E-86  |
| BC18-c17 | 16 |    | BC18q10_c17trans_contig12 | scaffold_6208     | 5E-13  | 95.7  | 116 | 1.00E-46  |
| BC18-c17 | 16 |    | BC40q10_c20_contig9       | superscaffold_202 | 0      | 92.5  | 106 | 2.00E-34  |
| BC18-c17 | 16 |    | BC40q10_c20_contig16      | superscaffold_354 | 0      | 94.1  | 101 | 1.00E-36  |
| BC18-c17 | 17 |    | BC18q10_c17_contig5       | scaffold_19569    | 0      | 100.0 | 128 | 1.00E-61  |
| BC18-c17 | 17 |    | BC40q10_c20_contig18      | scaffold_34618    | 2E-16  | 97.0  | 101 | 1.00E-41  |
| BC18-c17 | 17 | 2  | BC40q10_c20trans_contig2  | scaffold_40254    | 5E-26  |       |     |           |
| BC18-c17 | 17 |    | BC18q10_c17_contig17      | scaffold_42011    | 7E-24  | 93.4  | 152 | 5.00E-57  |
| BC18-c17 | 17 |    | BC18q10_c17_contig8       | scaffold_42011    | 7E-24  | 93.2  | 118 | 4.00E-42  |
| BC18-c17 | 17 |    | BC40q10_c20trans_contig1  | scaffold_42011    | 7E-24  | 89.3  | 234 | 1.00E-75  |
| BC18-c17 | 17 | 2  | BC40q10_c20trans_contig2  | scaffold_42011    | 7E-24  | 95.4  | 87  | 7.00E-32  |
| BC18-c17 | 17 |    | BC40q10_c20_contig10      | scaffold_7124     | 3E-15  | 99.0  | 99  | 6.00E-44  |
| BC18-c17 | 17 |    | BC18q10_c17trans_contig7  | scaffold_7132     | 6E-54  | 100.0 | 125 | 7.00E-60  |
| BC18-c17 | 17 |    | BC18q10_c17trans_contig9  | scaffold_7132     | 6E-54  | 99.2  | 397 | 0.0       |
| BC18-c17 | 17 |    | BC40q10_c20_contig4       | scaffold_7665     | 3E-65  | 99.1  | 112 | 4.00E-51  |
| BC18-c17 | 17 |    | BC18q10_c17_contig4       | scaffold_8364     | 8E-17  | 98.1  | 107 | 1.00E-46  |
| BC18-c17 | 17 | vs | BC40q10_c20_contig17      | scaffold_8364     | 8E-17  | 98.0  | 49  | 5.00E-16  |
| BC18-c17 | 17 |    | BC40q10_c20_contig12      | SFRU_RICE_010738  | 2E-38  | 99.5  | 187 | 1.00E-92  |
| BC18-c17 | 17 |    | BC18q10_c17_contig2       | superscaffold_725 | 0      | 100.0 | 134 | 7.00E-65  |
| BC18-c17 | 17 |    | BC40q10_c20_contig8       | superscaffold_725 | 0      | 98.2  | 113 | 2.00E-49  |
| BC18-c17 | 18 |    | BC18q10_c17_contig21      | scaffold_25799    | 3E-40  | 97.4  | 153 | 1.00E-68  |
| BC18-c17 | 22 | 2  | BC40q10_c20trans_contig3  | superscaffold_495 | 2E-14  |       |     | 2.00E-08  |
| BC18-c17 | 23 |    | BC18q10_c17trans_contig5  | superscaffold_604 | 1E-46  | 97.9  | 193 | 8.00E-91  |
| BC18-c17 | 23 |    | BC18q10_c17trans_contig6  | superscaffold_604 | 1E-46  | 93.2  | 147 | 1.00E-53  |
| BC18-c17 | 28 |    | BC18q10_c17_contig23      | scaffold_11686    | 4E-44  | 99.1  | 112 | 4.00E-51  |
| BC18-c17 | 28 |    | BC18q10_c17_contig26      | scaffold_11686    | 4E-44  | 99.1  | 219 | 2.00E-108 |
|          |    |    |                           |                   |        |       |     |           |
| BC18-c18 | 9  |    | BC40q10_c30trans_contig2  | scaffold_188      | 0      | 89.4  | 132 | 7.00E-40  |
| BC18-c18 | 11 |    | BC40q10_c30trans_contig1  | scaffold_5087     | 3E-59  | 93.8  | 336 | 7.00E-139 |
| BC18-c18 | 24 |    | BC18q10_c18trans_contig2  | scaffold_1685     | 1E-24  | 85.0  | 240 | 5.00E-59  |
|          |    |    |                           |                   |        |       |     |           |
| BC18-c19 | 7  | 2  | BC18q10_c19_contig5       | scaffold_1312     | 0      | 98.0  | 201 | 1.00E-94  |
| BC18-c19 | 7  | 2  | BC18q10_c19_contig6       | scaffold_1312     | 0      |       |     |           |
| BC18-c19 | 7  |    | BC40q10_c25_contig11      | scaffold_230      | 1E-35  | 93.9  | 228 | 2.00E-92  |
| BC18-c19 | 7  |    | BC40q10_c25_contig1       | scaffold_3280     | 3E-20  | 100.0 | 251 | 1.00E-129 |
| BC18-c19 | 7  |    | BC40q10_c25_contig6       | scaffold_344      | 2E-131 | 90.3  | 113 | 6.00E-35  |
| BC18-c19 | 7  | 2  | BC18q10_c19_contig5       | superscaffold_782 | 0      |       |     |           |
| BC18-c19 | 7  | 2  | BC18q10_c19_contig6       | superscaffold_782 | 0      | 100.0 | 89  | 4.00E-40  |
| BC18-c19 | 7  |    | BC18q10_c19_contig2       | superscaffold_800 | 6E-176 | 96.7  | 92  | 1.00E-36  |
|          |    |    |                           |                   |        |       |     |           |
| BC18-c20 | 3  |    | BC40q10_c21_contig5       | SFRU_RICE_028224  | 2E-15  | 96.3  | 80  | 5.00E-30  |
| BC18-c20 | 4  |    | BC18q10_c20_contig11      | superscaffold_161 | 0      | 95.3  | 191 | 9.00E-81  |
| BC18-c20 | 6  | 2  | BC40q10_c21_contig13      | scaffold_521      | 2E-33  | 99.6  | 267 | 8.00E-137 |

|          |    |   |                           |                    |        |       |     |           |
|----------|----|---|---------------------------|--------------------|--------|-------|-----|-----------|
| BC18-c20 | 6  | 2 | BC40q10_c21_contig16      | scaffold_521       | 2E-33  | 97.4  | 117 | 2.00E-50  |
| BC18-c20 | 10 | 2 | BC40q10_c21_contig13      | scaffold_16        | 0      |       |     | 8.00E-137 |
| BC18-c20 | 10 | 2 | BC40q10_c21_contig16      | scaffold_16        | 0      |       |     | 2.00E-50  |
| BC18-c20 | 12 |   | BC18q10_c20_contig2       | scaffold_12330     | 3E-73  | 93.2  | 103 | 4.00E-36  |
| BC18-c20 | 12 |   | BC18q10_c20_contig6       | scaffold_12330     | 3E-73  | 88.2  | 237 | 1.00E-70  |
| BC18-c20 | 12 |   | BC40q10_c21_contig1       | scaffold_12330     | 3E-73  | 93.2  | 103 | 4.00E-36  |
| BC18-c20 | 12 |   | BC40q10_c21_contig3       | scaffold_12330     | 3E-73  | 88.2  | 237 | 1.00E-70  |
| BC18-c20 | 12 | 2 | BC40q10_c21_contig14      | scaffold_1537      | 3E-46  | 99.3  | 139 | 6.00E-66  |
| BC18-c20 | 12 |   | BC18q10_c20_contig1       | scaffold_1558      | 0      | 99.3  | 151 | 1.00E-72  |
| BC18-c20 | 12 | 2 | BC40q10_c21_contig14      | scaffold_1595      | 1E-46  |       |     |           |
| BC18-c20 | 12 | 2 | BC40q10_c21_contig10      | scaffold_33339     | 5E-43  | 87.6  | 129 | 1.00E-32  |
| BC18-c20 | 12 |   | BC40q10_c21_contig2       | scaffold_33339     | 5E-43  | 98.0  | 100 | 9.00E-43  |
| BC18-c20 | 12 | 2 | BC40q10_c21_contig10      | scaffold_33671     | 4E-71  |       |     |           |
| BC18-c20 | 12 |   | BC18q10_c20_contig7       | scaffold_4990      | 2E-26  | 97.5  | 121 | 4.00E-52  |
| BC18-c20 | 12 |   | BC18q10_c20trans_contig1  | SFRU_RICE_003701   | 2E-66  | 99.0  | 190 | 5.00E-92  |
| BC18-c20 | 12 |   | BC40q10_c21_contig4       | superscaffold_1158 | 0      | 99.4  | 155 | 8.00E-75  |
| BC18-c20 | 12 |   | BC40q10_c21_contig6       | superscaffold_1158 | 0      | 100.0 | 132 | 9.00E-64  |
| BC18-c20 | 15 |   | BC40q10_c21trans_contig2  | superscaffold_42   | 5E-101 | 99.3  | 133 | 1.00E-62  |
| BC18-c20 | 17 |   | BC18q10_c20trans_contig6  | superscaffold_571  | 0      | 93.9  | 197 | 4.00E-79  |
| BC18-c20 | 17 |   | BC18q10_c20trans_contig7  | superscaffold_571  | 0      | 90.8  | 120 | 8.00E-39  |
| BC18-c20 | 19 |   | BC18q10_c20trans_contig2  | scaffold_7245      | 0      | 99.2  | 239 | 1.00E-119 |
| BC18-c20 | 22 |   | BC40q10_c21_contig15      | superscaffold_304  | 2E-47  | 99.1  | 213 | 3.00E-105 |
|          |    |   |                           |                    |        |       |     |           |
| BC18-c21 | 11 | 2 | BC40q10_c22trans_contig6  | scaffold_1285      | 1E-13  |       |     | 2.00E-67  |
| BC18-c21 | 11 | 2 | BC40q10_c22trans_contig6  | scaffold_2688      | 0      | 91.9  | 234 | 2.00E-87  |
| BC18-c21 | 11 |   | BC18q10_c21trans_contig2  | scaffold_7463      | 5E-25  | 89.2  | 158 | 6.00E-47  |
| BC18-c21 | 11 |   | BC40q10_c22trans_contig4  | SFRU_RICE_004909   | 4E-39  | 91.7  | 72  | 9.00E-20  |
| BC18-c21 | 11 |   | BC40q10_c22_contig1       | SFRU_RICE_005554   | 7E-33  | 93.3  | 104 | 1.00E-36  |
| BC18-c21 | 11 |   | BC40q10_c22_contig3       | SFRU_RICE_012770   | 1E-34  | 100.0 | 104 | 2.00E-48  |
| BC18-c21 | 11 |   | BC18q10_c21trans_contig4  | SFRU_RICE_012847   | 1E-140 | 93.2  | 74  | 2.00E-23  |
| BC18-c21 | 23 | 2 | BC18q10_c21_contig4       | scaffold_1857      | 2E-27  | 93.6  | 62  | 1.00E-17  |
|          |    |   |                           |                    |        |       |     |           |
| BC18-c22 | 9  |   | BC18q10_c22trans_contig6  | SFRU_RICE_016343   | 0      | 92.9  | 113 | 5.00E-40  |
| BC18-c22 | 15 |   | BC18q10_c22trans_contig13 | scaffold_9543      | 1E-91  | 97.3  | 146 | 8.00E-65  |
| BC18-c22 | 16 | 2 | BC18q10_c22trans_contig10 | scaffold_6208      | 5E-13  | 98.3  | 120 | 3.00E-53  |
| BC18-c22 | 22 |   | BC18q10_c22trans_contig1  | scaffold_266       | 9E-135 | 94.4  | 108 | 2.00E-40  |
| BC18-c22 | 23 |   | BC18q10_c22trans_contig2  | superscaffold_1052 | 8E-138 | 93.6  | 94  | 1.00E-31  |
| BC18-c22 | 24 |   | BC18q10_c22trans_contig8  | scaffold_17097     | 1E-24  | 98.5  | 133 | 6.00E-61  |
| BC18-c22 | 26 |   | BC18q10_c22trans_contig11 | SFRU_RICE_005307   | 5E-87  | 100.0 | 114 | 6.00E-54  |
|          |    |   |                           |                    |        |       |     |           |
| BC18-c23 | 15 |   | BC40q10_c07trans_contig3  | scaffold_1891      | 0      | 95.1  | 102 | 2.00E-38  |
| BC18-c23 | 15 |   | BC18q10_c23_contig3       | scaffold_21        | 0      | 94.8  | 96  | 1.00E-34  |
| BC18-c23 | 15 | 2 | BC18q10_c23trans_contig4  | scaffold_242       | 2E-27  |       |     | 1.00E-41  |

|          |    |   |                          |                    |        |       |     |           |
|----------|----|---|--------------------------|--------------------|--------|-------|-----|-----------|
| BC18-c23 | 15 |   | BC40q10_c07_contig5      | scaffold_3534      | 0      | 89.6  | 212 | 2.00E-67  |
| BC18-c23 | 15 |   | BC18q10_c23_contig2      | scaffold_37847     | 2E-12  | 90.3  | 72  | 7.00E-19  |
| BC18-c23 | 15 |   | BC40q10_c07_contig3      | scaffold_4848      | 5E-61  | 95.0  | 80  | 7.00E-28  |
| BC18-c23 | 15 |   | BC40q10_c07_contig4      | scaffold_602       | 2E-98  | 96.4  | 253 | 1.00E-115 |
| BC18-c23 | 15 |   | BC40q10_c07trans_contig5 | scaffold_9543      | 1E-91  | 97.9  | 192 | 3.00E-90  |
| BC18-c23 | 15 |   | BC18q10_c23_contig5      | scaffold_9604      | 4E-58  | 97.2  | 177 | 3.00E-80  |
| BC18-c23 | 15 |   | BC40q10_c07_contig8      | SFRU_RICE_002743   | 5E-28  | 91.2  | 159 | 3.00E-54  |
| BC18-c23 | 15 |   | BC40q10_c07trans_contig4 | SFRU_RICE_004231   | 5E-60  | 100.0 | 190 | 7.00E-96  |
| BC18-c23 | 15 |   | BC40q10_c07trans_contig1 | SFRU_RICE_012905   | 4E-39  | 100.0 | 104 | 2.00E-48  |
| BC18-c23 | 15 |   | BC40q10_c07_contig10     | superscaffold_1157 | 5E-28  | 93.2  | 118 | 5.00E-42  |
| BC18-c23 | 15 |   | BC40q10_c07_contig9      | superscaffold_493  | 2E-175 | 95.5  | 110 | 9.00E-43  |
| BC18-c23 | 15 |   | BC40q10_c07trans_contig2 | superscaffold_493  | 2E-175 | 94.9  | 97  | 7.00E-36  |
| BC18-c23 | 15 |   | BC40q10_c07_contig1      | superscaffold_624  | 5E-160 | 87.1  | 209 | 1.00E-56  |
| BC18-c23 | 15 |   | BC40q10_c07_contig7      | superscaffold_624  | 5E-160 | 93.5  | 339 | 5.00E-140 |
| BC18-c23 | 20 | 2 | BC18q10_c23trans_contig3 | scaffold_6397      | 4E-40  |       |     |           |
| BC18-c23 | 25 |   | BC18q10_c23trans_contig1 | scaffold_577       | 0      | 91.7  | 277 | 3.00E-101 |
| BC18-c23 | 28 |   | BC18q10_c23_contig4      | scaffold_722       | 1E-37  | 97.9  | 188 | 7.00E-88  |
|          |    |   |                          |                    |        |       |     |           |
| BC18-c24 | 7  | 2 | BC40q10_c24trans_contig4 | scaffold_230       | 1E-35  |       |     | 2.00E-25  |
| BC18-c24 | 11 |   | BC40q10_c24trans_contig3 | scaffold_15528     | 2E-161 | 91.7  | 192 | 1.00E-69  |
| BC18-c24 | 13 |   | BC18q10_c24_contig1      | superscaffold_637  | 0      | 97.6  | 165 | 9.00E-75  |
|          |    |   |                          |                    |        |       |     |           |
| BC18-c25 | 2  | 2 | BC18q10_c25trans_contig5 | SFRU_RICE_010151   | 3E-26  |       |     | 5.00E-26  |
| BC18-c25 | 4  |   | BC40q10_c27_contig9      | scaffold_2136      | 1E-146 | 99.4  | 171 | 1.00E-83  |
| BC18-c25 | 18 |   | BC18q10_c25_contig1      | scaffold_3044      | 5E-84  | 97.9  | 96  | 2.00E-40  |
| BC18-c25 | 18 |   | BC18q10_c25_contig4      | scaffold_3044      | 5E-84  | 80.5  | 164 | 9.00E-25  |
| BC18-c25 | 24 |   | BC40q10_c27_contig8      | SFRU_RICE_011931   | 1E-53  | 95.2  | 124 | 7.00E-49  |
| BC18-c25 | 27 | 2 | BC18q10_c25trans_contig3 | scaffold_13102     | 2E-24  |       |     |           |
| BC18-c25 | 27 |   | BC40q10_c27_contig5      | scaffold_181       | 2E-50  | 95.0  | 100 | 3.00E-37  |
| BC18-c25 | 27 |   | BC18q10_c25trans_contig7 | scaffold_52        | 9E-160 | 94.8  | 77  | 3.00E-26  |
| BC18-c25 | 27 |   | BC40q10_c27_contig7      | scaffold_52        | 9E-160 | 100.0 | 82  | 4.00E-36  |
| BC18-c25 | 27 |   | BC18q10_c25trans_contig6 | scaffold_607       | 3E-154 | 87.5  | 255 | 5.00E-74  |
| BC18-c25 | 27 | 2 | BC18q10_c25trans_contig5 | SFRU_RICE_020820   | 3E-28  | 100.0 | 138 | 4.00E-67  |
| BC18-c25 | 27 | 2 | BC18q10_c25trans_contig3 | superscaffold_1097 | 8E-79  | 91.0  | 199 | 1.00E-69  |
|          |    |   |                          |                    |        |       |     |           |
| BC18-c26 | 3  |   | BC18q10_c26_X_contig6    | superscaffold_111  | 0      | 98.8  | 246 | 2.00E-121 |
| BC18-c26 | 6  | 2 | BC18q10_c26_X_contig5    | scaffold_521       | 2E-33  | 98.6  | 573 | 0.0       |
| BC18-c26 | 10 | 2 | BC18q10_c26_X_contig5    | scaffold_16        | 0      |       |     | 0.00E+00  |
| BC18-c26 | 11 |   | BC18q10_c26_X_contig18   | scaffold_22580     | 3E-180 | 98.4  | 370 | 0.0       |
| BC18-c26 | 11 |   | BC40q10_c12trans_contig2 | scaffold_395       | 2E-24  | 93.0  | 71  | 4.00E-21  |
| BC18-c26 | 17 |   | BC18q10_c26_X_contig8    | scaffold_4502      | 3E-74  | 97.0  | 131 | 3.00E-56  |

|          |    |   |                          |                    |        |       |     |           |
|----------|----|---|--------------------------|--------------------|--------|-------|-----|-----------|
| BC18-c26 | 19 |   | BC18q10_c26_X_contig14   | scaffold_158       | 0      | 93.0  | 100 | 7.00E-34  |
| BC18-c26 | 19 |   | BC18q10_c26_X_contig15   | scaffold_158       | 0      | 94.9  | 138 | 2.00E-55  |
| BC18-c26 | 21 |   | BC40q10_c12_contig11     | scaffold_13640     | 2E-18  | 93.7  | 126 | 6.00E-46  |
| BC18-c26 | 21 |   | BC40q10_c12_contig9      | scaffold_13640     | 2E-18  | 97.1  | 208 | 3.00E-95  |
| BC18-c26 | 21 |   | BC40q10_c12_contig1      | scaffold_3849      | 1E-10  | 96.2  | 132 | 1.00E-54  |
| BC18-c26 | 21 |   | BC40q10_c12_contig3      | scaffold_7630      | 3E-25  | 100.0 | 113 | 3.00E-53  |
| BC18-c26 | 21 |   | BC40q10_c12_contig5      | scaffold_9801      | 8E-148 | 91.2  | 204 | 7.00E-73  |
| BC18-c26 | 21 |   | BC40q10_c12_contig6      | scaffold_9801      | 8E-148 | 95.6  | 183 | 1.00E-78  |
| BC18-c26 | 21 |   | BC40q10_c12trans_contig1 | SFRU_RICE_004516   | 0      | 100.0 | 104 | 2.00E-48  |
| BC18-c26 | 21 |   | BC40q10_c12_contig10     | SFRU_RICE_024839   | 3E-16  | 94.3  | 140 | 7.00E-55  |
|          |    |   |                          |                    |        |       |     |           |
| BC18-c28 | 2  | 2 | BC18q10_c28_contig6      | scaffold_2482      | 2E-34  | 97.7  | 128 | 1.00E-56  |
| BC18-c28 | 2  |   | BC40q10_c29_contig9      | scaffold_3005      | 5E-13  | 97.3  | 224 | 1.00E-104 |
| BC18-c28 | 2  | 2 | BC18q10_c28_contig6      | scaffold_464       | 4E-95  |       |     |           |
| BC18-c28 | 2  |   | BC18q10_c28_contig1      | SFRU_RICE_016681   | 1E-17  | 88.5  | 182 | 1.00E-53  |
| BC18-c28 | 7  |   | BC40q10_c29_contig10     | scaffold_230       | 1E-35  | 100.0 | 64  | 1.00E-25  |
| BC18-c28 | 16 | 2 | BC40q10_c29_contig1      | scaffold_6208      | 5E-13  | 96.0  | 151 | 1.00E-63  |
|          |    |   |                          |                    |        |       |     |           |
| BC18-c29 | 3  |   | BC40q10_c28_contig4      | scaffold_234       | 0      | 100.0 | 108 | 2.00E-50  |
| BC18-c29 | 10 |   | BC40q10_c28trans_contig1 | scaffold_1144      | 4E-140 | 100.0 | 154 | 7.00E-76  |
| BC18-c29 | 11 |   | BC18q10_c29_contig11     | scaffold_7463      | 5E-25  | 95.2  | 105 | 2.00E-39  |
| BC18-c29 | 11 |   | BC40q10_c28_contig7      | superscaffold_1110 | 4E-53  | 82.4  | 216 | 8.00E-43  |
| BC18-c29 | 19 | 2 | BC18q10_c29trans_contig4 | scaffold_445       | 3E-130 | 97.6  | 247 | 2.00E-117 |
| BC18-c29 | 19 | 2 | BC18q10_c29trans_contig4 | scaffold_519       | 1E-128 |       |     |           |
| BC18-c29 | 23 | 2 | BC18q10_c29_contig1      | scaffold_2332      | 0      |       |     |           |
| BC18-c29 | 23 | 2 | BC18q10_c29_contig7      | scaffold_2332      | 0      |       |     |           |
| BC18-c29 | 23 | 2 | BC40q10_c28_contig2      | scaffold_24206     | 4E-41  | 92.9  | 212 | 2.00E-82  |
| BC18-c29 | 23 |   | BC18q10_c29_contig2      | scaffold_26848     | 2E-40  | 89.6  | 134 | 2.00E-41  |
| BC18-c29 | 23 | 2 | BC40q10_c28_contig2      | scaffold_26848     | 2E-40  |       |     |           |
| BC18-c29 | 23 |   | BC18q10_c29_contig10     | scaffold_463       | 4E-66  | 94.0  | 117 | 8.00E-44  |
| BC18-c29 | 23 |   | BC18q10_c29_contig5      | SFRU_RICE_003952   | 0      | 91.8  | 122 | 2.00E-39  |
| BC18-c29 | 23 |   | BC40q10_c28_contig6      | SFRU_RICE_021239   | 0      | 88.5  | 165 | 1.00E-48  |
| BC18-c29 | 23 |   | BC18q10_c29_contig3      | superscaffold_1052 | 8E-138 | 95.2  | 124 | 2.00E-48  |
| BC18-c29 | 23 | 2 | BC18q10_c29_contig1      | superscaffold_1165 | 0      | 94.9  | 98  | 1.00E-36  |
| BC18-c29 | 23 | 2 | BC18q10_c29_contig7      | superscaffold_1165 | 0      | 91.6  | 142 | 1.00E-47  |
| BC18-c29 | 23 |   | BC18q10_c29trans_contig1 | superscaffold_511  | 0      | 97.1  | 136 | 3.00E-59  |
| BC18-c29 | 23 |   | BC18q10_c29_contig6      | superscaffold_755  | 0      | 95.9  | 98  | 2.00E-38  |
| BC18-c29 | 28 |   | BC40q10_c28trans_contig2 | scaffold_722       | 1E-37  | 95.1  | 142 | 1.00E-57  |
| BC18-c29 | 28 |   | BC18q10_c29trans_contig3 | superscaffold_75   | 5E-91  | 88.7  | 416 | 3.00E-133 |
|          |    |   |                          |                    |        |       |     |           |
| BC18-c30 | 6  |   | BC40q10_c10_contig3      | scaffold_20747     | 8E-29  | 92.9  | 127 | 6.00E-46  |
| BC18-c30 | 6  |   | BC40q10_c10_contig1      | scaffold_20856     | 2E-44  | 96.6  | 149 | 8.00E-65  |
| BC18-c30 | 6  | 3 | BC40q10_c10trans_contig9 | scaffold_5159      | 3E-31  |       |     |           |

|          |    |    |                          |                    |        |       |     |           |
|----------|----|----|--------------------------|--------------------|--------|-------|-----|-----------|
| BC18-c30 | 6  |    | BC40q10_c10trans_contig7 | scaffold_600       | 0      | 88.6  | 176 | 5.00E-53  |
| BC18-c30 | 6  |    | BC40q10_c10trans_contig2 | scaffold_828       | 0      | 90.1  | 111 | 3.00E-33  |
| BC18-c30 | 6  | 3  | BC40q10_c10trans_contig9 | scaffold_828       | 0      | 97.8  | 134 | 7.00E-60  |
| BC18-c30 | 6  |    | BC40q10_c10_contig5      | superscaffold_102  | 6E-35  | 89.3  | 149 | 7.00E-46  |
| BC18-c30 | 6  | 3  | BC40q10_c10trans_contig9 | superscaffold_1093 | 7E-33  |       |     |           |
| BC18-c30 | 6  |    | BC40q10_c10trans_contig1 | superscaffold_475  | 0      | 97.2  | 249 | 3.00E-116 |
| BC18-c30 | 6  |    | BC40q10_c10trans_contig3 | superscaffold_475  | 0      | 99.3  | 138 | 2.00E-65  |
| BC18-c30 | 6  |    | BC40q10_c10trans_contig6 | superscaffold_475  | 0      | 94.4  | 107 | 7.00E-39  |
| BC18-c30 | 7  | 2  | BC18q10_c30trans_contig1 | superscaffold_895  | 3E-160 | 87.8  | 74  | 2.00E-15  |
| BC18-c30 | 7  | 2  | BC18q10_c30trans_contig3 | superscaffold_895  | 3E-160 | 97.0  | 201 | 2.00E-91  |
|          |    |    |                          |                    |        |       |     |           |
| BC18-c31 | 4  |    | BC40q10_c15_contig1      | scaffold_102       | 0      | 93.5  | 306 | 1.00E-125 |
| BC18-c31 | 4  |    | BC40q10_c15trans_contig1 | scaffold_105       | 3E-133 | 92.5  | 80  | 2.00E-24  |
| BC18-c31 | 4  |    | BC18q10_c31_contig6      | scaffold_54        | 0      | 98.8  | 165 | 1.00E-78  |
| BC18-c31 | 4  | 2  | BC18q10_c31_contig1      | scaffold_6120      | 4E-15  | 87.1  | 233 | 4.00E-64  |
| BC18-c31 | 4  |    | BC18q10_c31_contig2      | superscaffold_1028 | 8E-106 | 97.1  | 137 | 7.00E-60  |
| BC18-c31 | 4  |    | BC18q10_c31_contig8      | superscaffold_161  | 0      | 99.0  | 100 | 2.00E-44  |
| BC18-c31 | 4  |    | BC40q10_c15_contig2      | superscaffold_161  | 0      | 98.3  | 181 | 3.00E-85  |
| BC18-c31 | 4  |    | BC40q10_c15_contig4      | superscaffold_161  | 0      | 97.0  | 100 | 4.00E-41  |
| BC18-c31 | 4  |    | BC40q10_c15_contig5      | superscaffold_161  | 0      | 96.3  | 162 | 2.00E-70  |
| BC18-c31 | 4  |    | BC40q10_c15_contig9      | superscaffold_161  | 0      | 97.1  | 102 | 3.00E-42  |
| BC18-c31 | 4  | 2  | BC18q10_c31_contig1      | superscaffold_51   | 0      |       |     |           |
| BC18-c31 | 4  |    | BC18q10_c31_contig12     | superscaffold_72   | 2E-130 | 96.5  | 366 | 2.00E-169 |
| BC18-c31 | 4  |    | BC18q10_c31_contig5      | superscaffold_72   | 2E-130 | 90.7  | 108 | 3.00E-33  |
| BC18-c31 | 4  |    | BC18q10_c31_contig7      | superscaffold_72   | 2E-130 | 99.2  | 126 | 3.00E-58  |
| BC18-c31 | 4  |    | BC18q10_c31trans_contig3 | superscaffold_72   | 2E-130 | 99.6  | 268 | 2.00E-137 |
| BC18-c31 | 22 |    | BC18q10_c31_contig3      | superscaffold_1091 | 1E-55  | 94.4  | 196 | 4.00E-79  |
| BC18-c31 | 24 | 2  | BC18q10_c31trans_contig2 | scaffold_15445     | 2E-111 |       |     |           |
| BC18-c31 | 24 | 2  | BC18q10_c31trans_contig4 | scaffold_15445     | 2E-111 |       |     |           |
| BC18-c31 | 24 | 2  | BC18q10_c31trans_contig2 | superscaffold_839  | 9E-111 | 100.0 | 83  | 1.00E-36  |
| BC18-c31 | 24 | 2  | BC18q10_c31trans_contig4 | superscaffold_839  | 9E-111 | 99.1  | 113 | 1.00E-51  |
| BC18-c31 | 28 |    | BC40q10_c15trans_contig3 | scaffold_897       | 3E-32  | 95.4  | 87  | 2.00E-31  |
| BC18-c32 | 24 | vs | BC18q10_c32trans_contig2 | scaffold_11156     | 2E-18  | 100.0 | 41  | 3.00E-13  |
| BC18-c32 | 24 |    | BC18q10_c32_contig1      | scaffold_2316      | 1E-27  | 92.0  | 236 | 6.00E-88  |
