# Supplementary material for: Genetic basis of allochronic differentiation in the fall armyworm
Source: PubMed Central journal article supplement (PMC5339952; doi:10.1186/s12862-017-0911-5), 2017-03-06
Supplement: 12862_2017_911_MOESM8_ESM.pdf [file 12862_2017_911_MOESM8_ESM.pdf]

## Additional file 8.

PCR conditions used in the mentioned experiments.

| Experiment                          | Candidate Gene                                | PCR components <sup>1</sup> |                               | PCR program |                             |                                    |
|-------------------------------------|-----------------------------------------------|-----------------------------|-------------------------------|-------------|-----------------------------|------------------------------------|
| QTL 1                               | Vrille                                        | 1 µl                        | DNA                           | 2 min       | 94°C                        |                                    |
|                                     |                                               | 11.92 µl                    | dH <sub>2</sub> O             | 35x {       | 94°C                        |                                    |
|                                     |                                               | 2 µl                        | 10x Taq buffer                |             | 45 s                        | T <sub>a</sub> <sup>2</sup>        |
|                                     |                                               | 2 µl                        | 2 mM dNTPs                    |             | 45 s                        | 72°C                               |
|                                     |                                               | 3 µl                        | 10 mM primer mix <sup>2</sup> |             | 60 s                        | 72°C                               |
|                                     |                                               | 0.08 µl                     | Taq polymerase                |             | 10 min                      | 72°C                               |
| Structure analysis of <i>Vrille</i> | Vrille                                        | 1 µl                        | DNA                           | 2 min       | 94°C                        |                                    |
|                                     |                                               | 11.92 µl                    | dH <sub>2</sub> O             | 45 s        | 94°C                        |                                    |
|                                     |                                               | 2 µl                        | 10x Taq buffer                | 35x {       | T <sub>a</sub> <sup>2</sup> |                                    |
|                                     |                                               | 2 µl                        | 2 mM dNTPs                    |             | 45 s                        | 72°C                               |
|                                     |                                               | 3 µl                        | 10 mM primer mix <sup>2</sup> |             | 90 s                        | 72°C                               |
|                                     |                                               | 0.08 µl                     | Taq polymerase                |             | 10 min                      | 72°C                               |
|                                     | Vrille (touchdown PCR for degenerate primers) | 1 µl                        | DNA                           | 3 min       | 94°C                        |                                    |
|                                     |                                               | 11.92 µl                    | dH <sub>2</sub> O             | 28x {       | 94°C                        |                                    |
|                                     |                                               | 2 µl                        | 10x Taq buffer                |             | 30 s                        | T <sub>a</sub> <sup>2*</sup>       |
|                                     |                                               | 2 µl                        | 2 mM dNTPs                    |             | 60 s                        | (decrease by 0,7)                  |
|                                     |                                               | 3 µl                        | 10 mM primer mix <sup>2</sup> | 30 s        | 72°C                        |                                    |
|                                     |                                               | 0.08 µl                     | Taq polymerase                | 23x {       | 94°C                        |                                    |
|                                     |                                               |                             |                               |             | 60 s                        | Lowest T <sub>a</sub> <sup>2</sup> |
|                                     |                                               |                             |                               |             | 72°C                        |                                    |
| Expression analysis                 | Vrille eIF1α                                  | 1 µl                        | cDNA                          | 10 min      | 90°C                        |                                    |
|                                     |                                               | 10 µl                       | dH <sub>2</sub> O             | 40x {       | 95°C                        |                                    |
|                                     |                                               | 1 µl                        | 10 mM primer fw               |             | 30 s                        | 58°C                               |
|                                     |                                               | 1 µl                        | 10 mM primer rv               |             | 60 s                        | 72°C                               |
|                                     |                                               | 12 µl                       | SYBR Mix <sup>3</sup>         |             | 60 s                        | 95°C                               |
|                                     |                                               |                             |                               |             | 30s                         | 58°C                               |
|                                     |                                               |                             |                               |             | 30s                         | 95°C                               |

<sup>1</sup>Taq polymerase, dNTPs, buffer and primers were purchased from Metabion, Martinsried, Germany

<sup>2</sup>Primers and corresponding annealing temperatures (T<sub>a</sub>) can be found in Table S6

<sup>3</sup> ABSolute Blue QPCR SYBR Green Mix from Thermo Fisher Scientific, Schwerte, Germany
