# Supplementary material for: Genetic basis of allochronic differentiation in the fall armyworm
Source: PubMed Central journal article supplement (PMC5339952; doi:10.1186/s12862-017-0911-5), 2017-03-06
Supplement: 12862_2017_911_MOESM9_ESM.pdf [file 12862_2017_911_MOESM9_ESM.pdf]

## Additional file 9

Primer combinations and annealing temperatures ( $T_a$ ) of candidate genes.

| Experiment                          | Candidate Gene | Primer                                                                                            | $T_a$ (°C) |
|-------------------------------------|----------------|---------------------------------------------------------------------------------------------------|------------|
| QTL 1                               | Vrille         | PC19 Forward: 5'CGACCCAAATGACTACTCTCCT<br>PC19 Reverse: 5' CGTCAGCTTACTCCTCTTGGTT                 | 58         |
|                                     |                | PC34 Forward: 5' ACCGGCTCATAATTGATCGTT<br>PC34 Reverse: 5'<br>GTCGGTTGCAAAAAGTGAATGTC             | 58         |
|                                     |                | PC38 Forward: 5' CGG GGC AAC CGA CAA AAA<br>AAT<br>PC38 Reverse: 5'<br>GCGTTCAATAAAAAGGACGCGGATCA | 58         |
|                                     |                | EBOX1 Forward: 5'<br>GATCCGCGTCCTTTTTATTGAAC<br>EBOX1 Reverse:<br>5'CGAAAGCATCACTCAACACAATG       | 58         |
| Structure analysis of <i>Vrille</i> | Vrille         | PC8 Forward: 5'GTCCGCCGAAACATGGTYGCMG<br>PC8 Reverse: 5' GDACTGAACCGGGDGGTTCCG                    | 61 -50     |
|                                     |                | PC19 Forward: 5'CGACCCAAATGACTACTCTCCT<br>PC19 Reverse: 5' CGTCAGCTTACTCCTCTTGGTT                 | 58         |
|                                     |                | PC21 Forward: 5'CCCTACCAGGAGAGGCTACC<br>PC21 Forward: 5' TCAGTGCTCGWGCSMGC GSG                    | 58         |
|                                     |                | PC34 Forward: 5' ACCGGCTCATAATTGATCGTT<br>PC34 Reverse: 5'<br>GTCGGTTGCAAAAAGTGAATGTC             | 58         |
|                                     |                | PC38 Forward: 5' CGG GGC AAC CGA CAA AAA<br>AAT<br>PC38 Reverse: 5'<br>GCGTTCAATAAAAAGGACGCGGATCA | 58         |
|                                     |                | CDS+5' Forward: 5'<br>TGTCACGTGTTTCAAGCATGGTA<br>CDS+5' Reverse: 5'<br>TGTTCTGGTGCATCATGTTCTTC    | 58         |
|                                     |                | EBOXBCD Forward: 5'<br>ATTTCACGTTCTTCGATCAC<br>EBOXBCD Reverse: 5'<br>TAAATGCAAATGCACAGAAC        | 55         |
|                                     |                | EBOXDE Forward: 5'<br>CTAATCGCGGTTCTAATGAC<br>EBOXDE Reverse: 5'<br>CATTCGAAACTTAAGGTTGC          | 55         |
|                                     |                | EBOXFGH Forward: 5'<br>GCAACCTTAAGTTTCGAATG<br>EBOXFGH Reverse:<br>ACGGTGACGACACTCTAAAT           | 55         |

|                     |               |                                                                                                                                                  |                      |
|---------------------|---------------|--------------------------------------------------------------------------------------------------------------------------------------------------|----------------------|
|                     |               | EBOXI Forward: 5'<br>GATCCGCGTCCTTTTTATTGAAC<br>EBOXI Reverse:<br>5'CGAAAGCATCACTCAACACAATG                                                      | 58                   |
|                     |               | EBOXJ Forward: 5'<br>ACCGGCTCATAATTGATCGTT<br>EBOXJ Reverse: 5'GCGGATTTCTTCCGTTACAA                                                              | 58                   |
|                     |               | EBOXK Forward: 5'<br>TGTCACGTGTTTCAAGCATGGTA<br>EBOXK Reverse:<br>5'GTCGGTTGCAAAAAGTGAATGTC                                                      | 58                   |
|                     |               | DNAwalk1 TSP1:<br>5'GCGTCAGCTTACTCCTCCTTGGTT<br>DNAwalk1 TSP2:<br>5'GCTGTGCTTTGAGTACGTGGTTC<br>DNAwalk1 TSP3:<br>5'GCGCTGTCCAAAGAACTCCTTGC       | 65<br>65<br>66       |
|                     |               | DNAwalk2 TSP1:<br>5'TGAGCCGGTAATACAGGAAGTGTA<br>DNAwalk2 TSP2:<br>5'TGCCTATTGTGGCGACTTAGTTTGAT<br>DNAwalk2 TSP3:<br>5'GCGTTCAATAAAAAGGACGCGGATCA | 64.1<br>64.4<br>66.2 |
| Expression analysis | Vrille        | Forward: 5' CTGTGCTTTGAGTACGTGGTTC<br>Reverse: 5' GCAAACAGAGGGAGTTCATACC                                                                         | 58                   |
|                     | eIF1 $\alpha$ | Forward: 5'AGGAGTTGCGTCGTGGTTAC<br>Reverse: 5' CTTTGATTTTCGGCGAACTTG                                                                             | 58                   |
