# Supplementary material for: Genetic basis of allochronic differentiation in the fall armyworm
Source: PubMed Central journal article supplement (PMC5339952; doi:10.1186/s12862-017-0911-5), 2017-03-06
Supplement: 12862_2017_911_MOESM10_ESM.pdf [file 12862_2017_911_MOESM10_ESM.pdf]

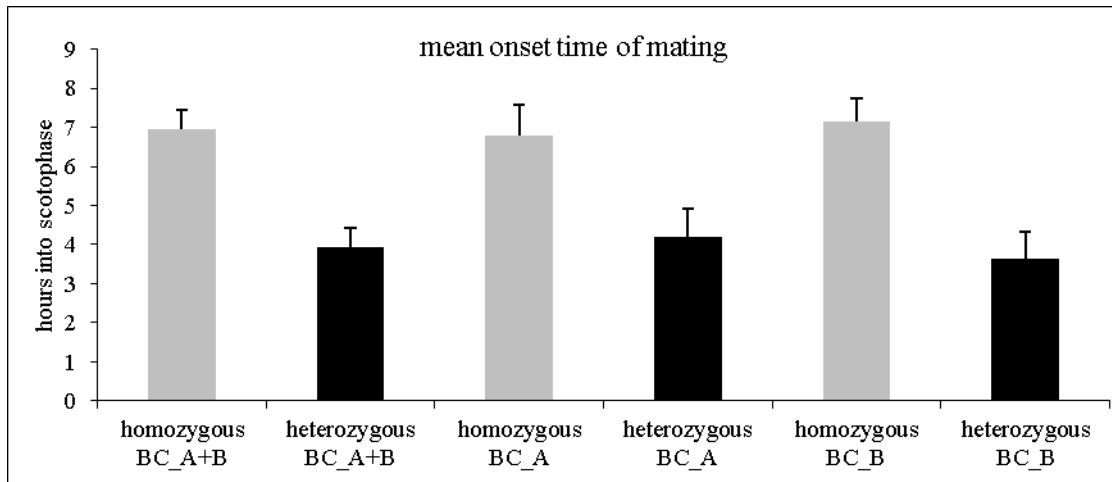

### Additional file 10

**Mean onset time of mating** for individuals that are homozygous (carrying only rice-strain copies) or heterozygous (carrying a corn-strain copy) for the QTL chromosome *Sf\_C25* in both backcrosses analyzed together (left two bars) or analyzed individually (middle two bars BC\_A, right two bars BC\_B). In all analyses, homozygous individuals with no corn-strain copy mated significantly later than the heterozygous individuals, which is consistent with the strain-specific mating time of rice-strain individuals mating significantly later than corn-strain individuals.
