# Supplementary material for: Genetic basis of allochronic differentiation in the fall armyworm
Source: PubMed Central journal article supplement (PMC5339952; doi:10.1186/s12862-017-0911-5), 2017-03-06
Supplement: 12862_2017_911_MOESM12_ESM.pdf [file 12862_2017_911_MOESM12_ESM.pdf]

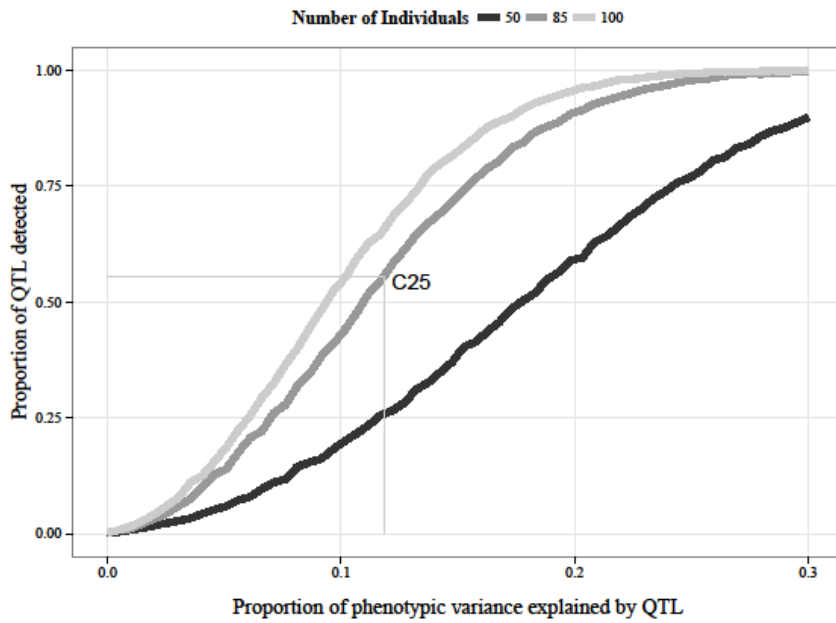

### Additional file 12

Power analysis for backcross families with 50 (black line), 85 (corresponding to the QTL in this manuscript, dark grey line) and 100 (black line) progeny, respectively. The probability of detecting a QTL is plotted as a function of the fraction of phenotypic variance explained by the QTL.
