# Supplementary material for: Genetic basis of allochronic differentiation in the fall armyworm
Source: PubMed Central journal article supplement (PMC5339952; doi:10.1186/s12862-017-0911-5), 2017-03-06
Supplement: 12862_2017_911_MOESM13_ESM.pdf [file 12862_2017_911_MOESM13_ESM.pdf]

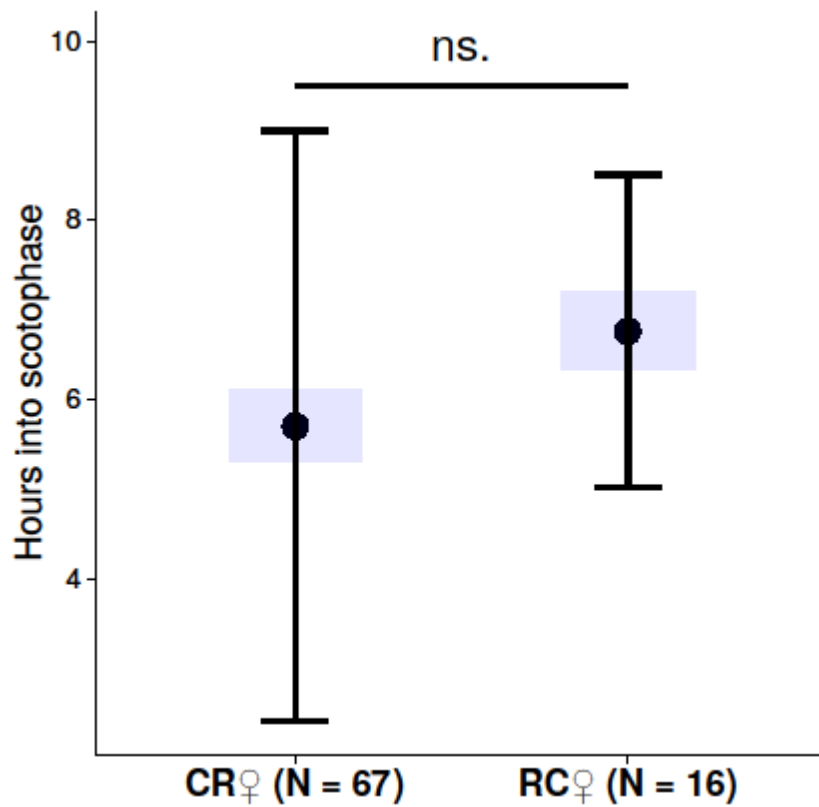

### Additional file 13

Mating time in *S. frugiperda* hybrids.

Onset time of first mating in *S. frugiperda* hybrid females. The reciprocal crosses (CR= corn-strain mother, rice-strain father; RC= rice-strain mother, corn-strain father) do not show differences in mating time. This excludes the involvement of the sex chromosome in the timing differentiation.
