# Supplementary material for: Genetic basis of allochronic differentiation in the fall armyworm
Source: BMC Evol Biol. 2017 Mar 6;17:68. doi: 10.1186/s12862-017-0911-5 (PMC5339952; doi:10.1186/s12862-017-0911-5)
Supplement: Additional file 2: — Spodoptera frugiperda populations. (PDF 68 kb) [file 12862_2017_911_MOESM2_ESM.pdf]

## Additional file 2

*Spodoptera frugiperda* populations.

The origin of the populations used for different experiments

| Experiment                 | Strain      | Population Origin |                    | Field | Date | Name               |
|----------------------------|-------------|-------------------|--------------------|-------|------|--------------------|
| Timing QTL                 | Corn        | Florida           | Homestead          | Corn  | 2004 | CL1                |
|                            | Rice        | Florida           | Ona                | Grass | 2003 | RL1                |
| Genetic analysis of Vville | Corn        | Argentina         | Los Pereyra        | Corn  | 2010 | CF1                |
|                            |             | Argentina         | Santo Tomé         | Corn  | 2008 | CF2                |
|                            |             | Florida           | Homestead          | Corn  | 2004 | CL1                |
|                            |             | Puerto Rico       | Santa Isabel       | Corn  | 2010 | CL2                |
|                            | Rice        | Argentina         | Benjamín Aráoz     | Grass | 2008 | RF1                |
|                            |             | Argentina         | Berón de Astrada   | Rice  | 2008 | RF2                |
|                            |             | Paraguay          | San Cosme y Damián | Rice  | 2008 | RF3                |
|                            |             | Texas             | College Station    | Corn  | 2010 | CF3                |
|                            |             | Florida           | Ona                | Grass | 2003 | RL1                |
|                            |             | Florida           | Moore Haven        | Grass | 2010 | RL2                |
|                            | Corn & Rice | Florida           | Hague              | Corn  | 2011 | Pheromone trapping |
|                            |             | Argentina         | La Cocha           | Corn  | 2008 | CF4                |
| Expression analysis        | Corn        | Florida           | Homestead          | Corn  | 2004 | CL1                |
|                            | Rice        | Florida           | Ona                | Grass | 2003 | RL1                |
