# Supplementary material for: Genetic basis of allochronic differentiation in the fall armyworm
Source: BMC Evol Biol. 2017 Mar 6;17:68. doi: 10.1186/s12862-017-0911-5 (PMC5339952; doi:10.1186/s12862-017-0911-5)
Supplement: Additional file 4: — Numbers of scored AFLP markers. (PDF 56 kb) [file 12862_2017_911_MOESM4_ESM.pdf]

#### Additional file 4

##### AFLP markers

Number of informative AFLP-makers scored per primer combination in the three different backcross families (BC) A-C.)

| Primer <sup>1</sup> |       | Number of AFLP-markers |      |
|---------------------|-------|------------------------|------|
| MseI                | EcoRI | BC A                   | BC B |
| AAG                 | AAG   | 21                     | 18   |
|                     | ACC   | 9                      | 5    |
|                     | ACG   | 14                     | 11   |
|                     | ACT   | 6                      | 8    |
|                     | CGA   | 6                      | 7    |
|                     | CGC   | 4                      | 5    |
| ACA                 | AAG   | 19                     | 17   |
|                     | ACC   | 8                      | 11   |
|                     | ACG   | 7                      | 8    |
|                     | ACT   | 14                     | 16   |
|                     | CGA   | 11                     | 11   |
|                     | CGC   | 11                     | 13   |
| ACC                 | AAC   | 7                      | 10   |
|                     | ACA   | 6                      | 9    |
| ACG                 | AAG   | 6                      | 9    |
|                     | ACC   | 5                      | 3    |
|                     | ACG   | 5                      | 2    |
|                     | ACT   | 4                      | 5    |
|                     | CGA   | 7                      | 7    |
|                     | CGC   | 4                      | 3    |
| ACT                 | AGA   | 7                      | 20   |
|                     | AGC   | 6                      | 8    |
| AGG                 | AAG   | 15                     | 10   |
|                     | ACC   | 10                     | 11   |
|                     | ACG   | 3                      | 2    |
|                     | ACT   | 7                      | 6    |
|                     | CGA   | 5                      | 5    |
|                     | CGC   | 4                      | 2    |
| CAA                 | AGG   | 2                      | 4    |
|                     | ATG   | 5                      | 9    |
| CAC                 | CAT   | 7                      | 15   |
|                     | TAC   | 6                      | 9    |
| CAG                 | GTA   | 3                      | 3    |
|                     | TCT   | 3                      | 3    |
| CAT                 | AAG   | 6                      | 10   |
|                     | ACC   | 9                      | 11   |
|                     | ACG   | 5                      | 6    |
|                     | ACT   | 6                      | 3    |
|                     | CGA   | 9                      | 12   |

|                      |     |                        |                        |
|----------------------|-----|------------------------|------------------------|
|                      | CGC | 6                      | 3                      |
| CCA                  | ACA | 5                      | 11                     |
|                      | TTA | -                      | 3                      |
| CCC                  | GTA | 6                      | 7                      |
|                      | TTA | 5                      | 5                      |
| CCG                  | AGC | 7                      | 6                      |
|                      | TAC | 3                      | 8                      |
| CCT                  | AGA | 4                      | 4                      |
|                      | AGG | 2                      | 2                      |
| CGA                  | AAG | 13                     | 8                      |
|                      | ACC | 1                      | 8                      |
|                      | ACG | 9                      | 6                      |
|                      | ACT | 11                     | 9                      |
|                      | CGA | 11                     | 5                      |
|                      | CGC | 3                      | 3                      |
| CTC                  | AAC | 12                     | 12                     |
|                      | CAT | 6                      | 10                     |
| CTG                  | AAG | 7                      | 9                      |
|                      | ACC | 13                     | 15                     |
|                      | ACG | 6                      | 7                      |
|                      | ACT | 3                      | 2                      |
|                      | CGA | 4                      | 5                      |
|                      | CGC | 1                      | 3                      |
| CTT                  | AGG | 13                     | 15                     |
|                      | ATG | 22                     | 21                     |
| <b>Total markers</b> |     | <b>465<sup>2</sup></b> | <b>514<sup>2</sup></b> |

<sup>1</sup>All primers have a core sequence (MseI- primer: 5'-GATGAGTCCTGAGTAA; EcoRI- primer: 5'-GACTGCGTACCAATTC) plus three selective bases at the end (according to the table).

<sup>2</sup>Of all markers scored in the timing QTL analysis, 294 markers were present in both backcross families A and B.
