# Supplementary material for: Genetic basis of allochronic differentiation in the fall armyworm
Source: BMC Evol Biol. 2017 Mar 6;17:68. doi: 10.1186/s12862-017-0911-5 (PMC5339952; doi:10.1186/s12862-017-0911-5)
Supplement: Additional file 6: — Homologous chromosomes of S. frugiperda and B. mori. (PDF 20 kb) [file 12862_2017_911_MOESM6_ESM.pdf]

## Additional file 6

Homologous chromosomes of *S. frugiperda* and *B. mori*.

Homology is indicated by framed numbers at the intersection of *Bm* and *Sf* chromosomes.

Numbers at intersections correspond to numbers of individual *Sf* contigs that produced significant BLAST hits against the *Bm* chromosome. BLAST hits originating from both BCs were given preference. When no *Bm* chromosome was hit by contigs from both BCs, the highest number of individual hits was given preference. Orange field = BLAST hits produced by contigs originating from BC\_A. Blue field = BLAST hits produced by contigs originating from BC\_B. Green fields = BLAST hits produced by contigs originating from BC\_A+B.

Clock genes mapping to the *Bm* chromosomes are indicated in the second column. R<sup>2</sup> and P-values of the *Sf* QTC are given in the two right columns.

| <i>Bm</i><br>chr. | clock genes<br>mapping to <i>Bm</i><br>chromosomes | <i>Sf</i><br>chr. |    | <i>Bm</i> chromosomes |   |    |    |    |    |   |   |   |    |     |    |    |    |    |    |    |    |    |    |    |    |     |     |     |     |     |       | R <sup>2</sup><br>BC_A<br>+BC_B | P<br>BC_A<br>+BC_B |
|-------------------|----------------------------------------------------|-------------------|----|-----------------------|---|----|----|----|----|---|---|---|----|-----|----|----|----|----|----|----|----|----|----|----|----|-----|-----|-----|-----|-----|-------|---------------------------------|--------------------|
|                   |                                                    | A                 | B  | 1                     | 2 | 3  | 4  | 5  | 6  | 7 | 8 | 9 | 10 | 11* | 12 | 13 | 14 | 15 | 16 | 17 | 18 | 19 | 20 | 21 | 22 | 23* | 24* | 25  | 26  | 27  | 28    |                                 |                    |
| 1                 | clk, cyc, per, pdp1                                | X                 | X  |                       |   |    |    |    |    |   |   |   |    |     |    |    |    |    |    |    |    |    |    |    |    |     |     |     |     |     |       |                                 |                    |
| 2                 |                                                    | 28                | 29 |                       | 4 |    |    |    |    | 1 |   |   |    |     |    |    |    | 1  |    |    |    |    |    |    |    |     |     |     |     |     |       | 0.077                           | 0.014              |
| 3                 | lark, jet                                          | 1                 | 23 |                       |   | 11 |    |    | 4  | 1 |   |   |    | 3   |    |    | 1  | 3  | 1  |    | 1  |    | 2  |    |    | 2   | 3   |     |     | 4   |       |                                 |                    |
| 4                 | tim                                                | 31                | 15 |                       |   |    | 15 |    |    |   |   |   |    |     |    |    |    |    |    |    |    |    |    | 1  |    | 4   |     |     |     | 1   |       |                                 |                    |
| 5                 | CK2α                                               | 9                 | 9  |                       |   |    |    | 17 |    | 1 |   |   | 1  |     |    |    |    | 1  |    |    |    |    |    | 1  |    |     |     |     | 1   | 1   |       |                                 |                    |
| 6                 |                                                    | 30                | 10 |                       |   |    |    |    | 11 | 2 |   |   |    |     |    |    |    |    |    |    |    |    |    |    |    |     |     |     |     |     |       | 0.082                           | 0.01               |
| 7                 |                                                    | 19                | 25 |                       |   |    |    |    |    | 8 |   |   |    |     |    |    |    |    |    |    |    |    |    |    |    |     |     |     |     |     |       |                                 |                    |
| 8                 |                                                    | 15                | 1  |                       |   |    |    |    |    | 2 | 6 |   |    |     |    | 4  |    |    | 1  |    |    |    |    | 1  |    | 1   |     |     |     | 2   |       |                                 |                    |
| 9                 |                                                    | 16                | 3  |                       |   |    |    |    |    |   |   | 6 |    |     |    |    |    |    |    |    |    |    |    | 3  |    | 1   | 0.5 |     | 0.5 |     |       |                                 |                    |
| 10                |                                                    | 14                | 16 |                       |   |    |    |    |    | 1 |   | 1 | 13 |     |    |    | 1  |    |    |    |    |    |    |    |    | 1   | 1   |     |     | 1   |       |                                 |                    |
| 11*               |                                                    | 21                | 22 |                       |   |    |    |    |    |   |   |   | 7  |     |    |    |    |    |    |    |    |    |    |    |    | 1   |     |     |     |     |       |                                 |                    |
| 12                |                                                    | 20                | 21 |                       | 1 | 1  |    | 2  |    |   |   |   | 2  |     | 14 |    |    | 1  |    | 2  |    | 1  |    | 1  |    |     |     |     |     |     | 0.065 | 0.023                           |                    |
| 13                |                                                    | 24                | 24 |                       |   |    |    |    |    | 1 |   |   |    |     | 1  |    |    |    |    |    |    |    |    |    |    |     |     |     |     |     |       |                                 |                    |
| 14                |                                                    | 3                 | 18 |                       |   | 1  |    |    |    |   |   |   |    |     |    | 3  |    |    |    |    | 2  |    |    |    |    | 1   | 1   | 1   |     |     |       |                                 |                    |
| 15                | cry2, CK2β                                         | 23                | 7  |                       |   |    |    |    |    |   |   |   |    |     |    |    | 17 |    |    |    |    | 1  |    |    |    |     |     | 1   |     | 1   |       |                                 |                    |
| 16                |                                                    | 4                 | 2  |                       |   |    |    |    |    |   |   |   |    |     |    |    |    | 6  | 1  |    |    |    |    |    |    | 1   |     |     |     |     |       |                                 |                    |
| 17                | cry1, dbt                                          | 17                | 20 | 2                     |   |    | 3  |    | 2  | 1 |   | 1 |    |     |    |    |    | 5  | 4  | 16 | 1  |    |    | 1  | 2  |     |     |     |     | 2   |       |                                 |                    |
| 18                | sgg                                                | 13                | 14 |                       |   |    |    |    |    | 1 |   |   |    |     |    |    |    |    |    |    | 4  |    |    |    |    | 1   |     |     |     | 1   |       |                                 |                    |
| 19                |                                                    | 8                 | 8  |                       |   |    |    | 2  |    |   |   |   |    |     |    |    | 1  |    |    | 1  | 1  | 13 |    |    | 1  | 1   | 1   |     |     | 1   | 1     |                                 |                    |
| 20                |                                                    | 5                 | 5  |                       |   | 2  |    | 1  | 2  |   | 6 |   |    | 1   |    |    |    | 2  | 2  |    |    |    |    |    |    | 9   |     | 1   |     |     |       |                                 |                    |
| 21                |                                                    | 26                | 12 |                       |   | 1  |    |    | 1  |   |   |   | 1  | 2   |    |    |    |    |    | 1  |    | 2  |    | 8  |    |     |     |     |     |     |       |                                 |                    |
| 22                | cwo, CaMKII                                        | 6                 | 6  |                       |   |    |    |    |    |   | 4 |   |    |     |    |    |    |    |    |    |    | 1  |    |    | 8  |     |     |     |     |     |       |                                 |                    |
| 23*               |                                                    | 29                | 28 |                       |   | 1  |    |    |    |   |   |   | 1  | 2   |    |    |    |    |    |    |    |    | 1  |    |    |     | 12  |     |     |     | 2     |                                 |                    |
| 23*               |                                                    | 12                | 13 |                       |   |    |    |    |    |   |   |   |    |     |    |    |    |    |    |    |    |    |    |    |    | 2   |     |     |     |     |       |                                 |                    |
| 24*               |                                                    | 32                |    |                       |   |    |    |    |    |   |   |   |    |     |    |    |    |    |    |    |    |    |    |    |    |     |     |     |     |     |       |                                 |                    |
| 25                |                                                    | 2                 | 17 |                       |   |    | 1  |    |    |   |   | 1 |    |     |    |    | 4  | 3  |    |    |    |    |    |    |    |     |     | 2   |     |     |       |                                 |                    |
| 27                | vri                                                | 25                | 27 |                       | 1 |    | 1  |    |    |   |   |   |    |     |    |    |    |    |    |    |    | 2  |    |    |    | 1   |     |     |     | 7   |       |                                 |                    |
| 28                | slimb                                              | 10                | 11 | 2                     |   | 1  |    | 1  |    | 1 | 1 |   |    | 1   |    |    |    |    |    |    |    | 1  |    |    |    |     |     |     |     |     | 6     |                                 |                    |
|                   |                                                    | 11                |    |                       |   |    |    |    |    |   |   |   |    |     |    |    |    |    |    |    |    |    |    |    |    |     |     |     |     |     | 0.5   |                                 |                    |
|                   |                                                    | 18                | 30 |                       |   |    |    |    |    | 1 |   | 1 |    |     |    |    |    |    |    |    |    |    |    |    |    |     | 1   |     |     |     |       |                                 |                    |
|                   |                                                    | 22                |    |                       |   |    |    |    |    |   | 1 |   |    |     |    |    |    | 1  | 1  |    |    |    |    |    |    | 1   | 1   | 1   |     | 1   |       |                                 |                    |
|                   |                                                    | 4                 |    |                       |   |    |    |    |    |   |   |   | 2  | 1   |    |    |    |    |    |    |    |    |    |    |    |     | 1   |     |     |     |       |                                 |                    |
|                   |                                                    | 19                |    |                       |   | 1  |    |    |    |   |   |   |    |     |    |    |    |    |    | 1  |    |    |    |    |    |     |     | 0.5 | 0.5 | 1.5 |       | 0.5                             |                    |
