# Supplementary material for: Genetic basis of allochronic differentiation in the fall armyworm
Source: Springer Nature journal article supplement (doi:10.1186/s12862-017-0911-5), 2017-03-06
Supplement: MOESM11 [file 12862_2017_911_MOESM11_ESM.pdf]

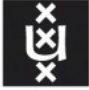

**UvA-DARE (Digital Academic Repository)**

**Genetic basis of allochronic differentiation in the fall armyworm**

Hänniger, S.; Dumas, P.; Schöfl, G.; Gebauer-Jung, S.; Vogel, H.; Unbehend, M.; Heckel, D.G.; Groot, A.T.

*Published in:*  
BMC Evolutionary Biology

*DOI:*  
[10.1186/s12862-017-0911-5](https://doi.org/10.1186/s12862-017-0911-5)

[Link to publication](#)

*Citation for published version (APA):*

Hänniger, S., Dumas, P., Schöfl, G., Gebauer-Jung, S., Vogel, H., Unbehend, M., ... Groot, A. T. (2017). Genetic basis of allochronic differentiation in the fall armyworm. *BMC Evolutionary Biology*, 17, [68]. DOI: 10.1186/s12862-017-0911-5

**General rights**

It is not permitted to download or to forward/distribute the text or part of it without the consent of the author(s) and/or copyright holder(s), other than for strictly personal, individual use, unless the work is under an open content license (like Creative Commons).

**Disclaimer/Complaints regulations**

If you believe that digital publication of certain material infringes any of your rights or (privacy) interests, please let the Library know, stating your reasons. In case of a legitimate complaint, the Library will make the material inaccessible and/or remove it from the website. Please Ask the Library: <http://uba.uva.nl/en/contact>, or a letter to: Library of the University of Amsterdam, Secretariat, Singel 425, 1012 WP Amsterdam, The Netherlands. You will be contacted as soon as possible.

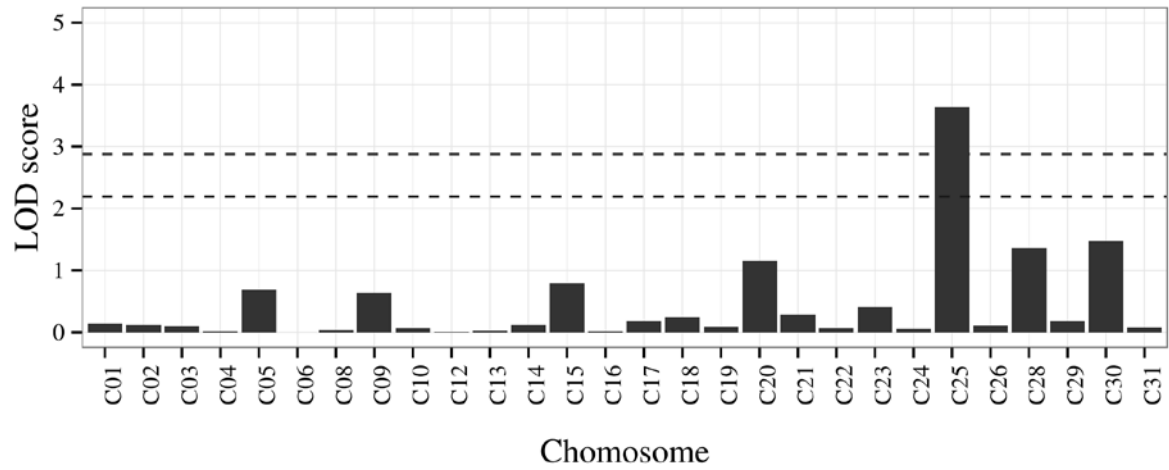

### **Additional file 11**

LOD scores for all linkage groups in the combined analysis of the two timing backcross families, empirically determined by 10,000 permutations. 0.05 and 0.10 significance thresholds are represented by dashed lines.
