# Supplementary material for: Genetic basis of allochronic differentiation in the fall armyworm
Source: Springer Nature journal article supplement (doi:10.1186/s12862-017-0911-5), 2017-03-06
Supplement: MOESM14 [file 12862_2017_911_MOESM14_ESM.pdf]

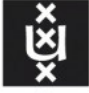

**UvA-DARE (Digital Academic Repository)**

**Genetic basis of allochronic differentiation in the fall armyworm**

Hänniger, S.; Dumas, P.; Schöfl, G.; Gebauer-Jung, S.; Vogel, H.; Unbehend, M.; Heckel, D.G.; Groot, A.T.

*Published in:*  
BMC Evolutionary Biology

*DOI:*  
[10.1186/s12862-017-0911-5](https://doi.org/10.1186/s12862-017-0911-5)

[Link to publication](#)

*Citation for published version (APA):*

Hänniger, S., Dumas, P., Schöfl, G., Gebauer-Jung, S., Vogel, H., Unbehend, M., ... Groot, A. T. (2017). Genetic basis of allochronic differentiation in the fall armyworm. *BMC Evolutionary Biology*, 17, [68]. DOI: 10.1186/s12862-017-0911-5

**General rights**

It is not permitted to download or to forward/distribute the text or part of it without the consent of the author(s) and/or copyright holder(s), other than for strictly personal, individual use, unless the work is under an open content license (like Creative Commons).

**Disclaimer/Complaints regulations**

If you believe that digital publication of certain material infringes any of your rights or (privacy) interests, please let the Library know, stating your reasons. In case of a legitimate complaint, the Library will make the material inaccessible and/or remove it from the website. Please Ask the Library: <http://uba.uva.nl/en/contact>, or a letter to: Library of the University of Amsterdam, Secretariat, Singel 425, 1012 WP Amsterdam, The Netherlands. You will be contacted as soon as possible.

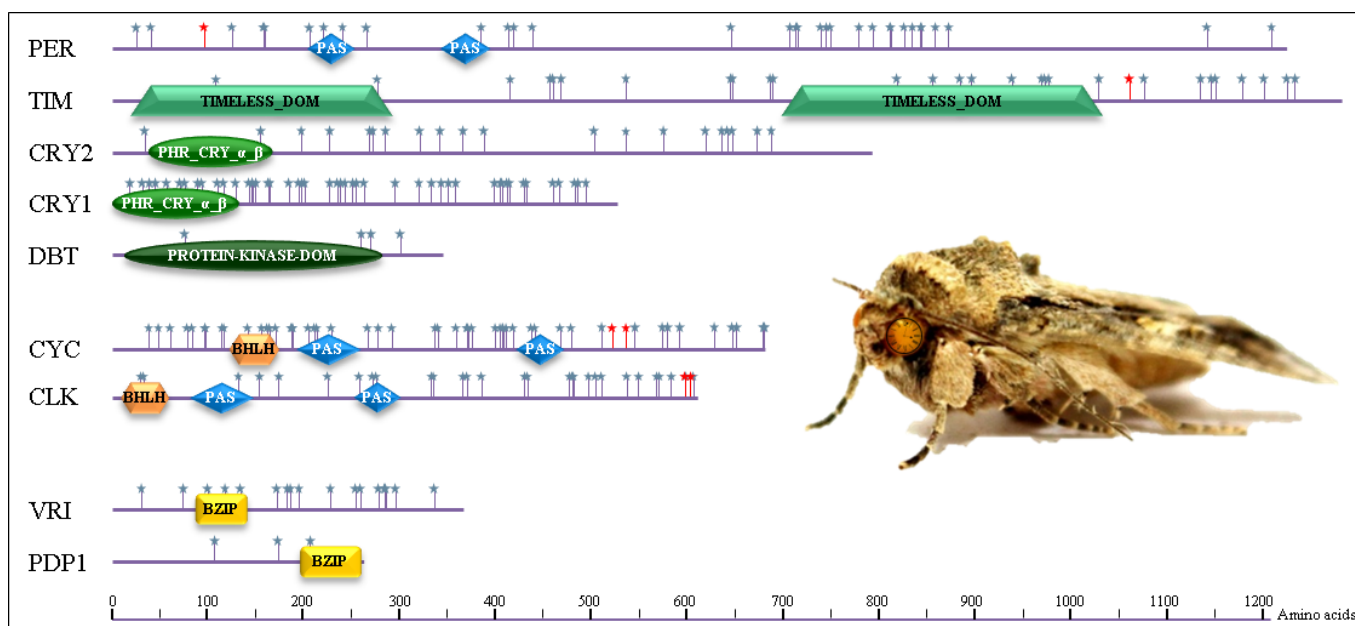

#### Additional file 14

Position of SNPs between the corn-strain and rice-strain of *S. frugiperda* in the coding regions of the major clock genes. Proteins are sorted by their position in the two different feedback loops (see Figure 1). Blue stars show synonymous SNPs, red stars show non-synonymous SNPs. Conserved protein domains are shown as colored shapes; same shape and name indicate the same domain function in different proteins. None of the non-synonymous SNPs are located in conserved domains of the proteins. PAS = PAS-domain (signal sensor), TIMELESS\_DOM = TIMELESS specific conserved domain, PHR\_CRY\_α\_β = Photolyase/cryptochrome alpha/beta domain, PROTEIN-KINASE-DOM = Protein kinase domain (with catalytic function), BHLH = basic helix-loop-helix (transcription factor family), BZIP = Basic leucine zipper (DNA binding).
